# Supplementary material for: NBS/DBU mediated one-pot synthesis of α-acyloxyketones from benzylic secondary alcohols and carboxylic acids
Source: Royal Society of Chemistry journal article supplement (doi:10.1039/c6ob02173e), 2016-01-01

## Supplementary Information

# **NBS/DBU mediated one-pot synthesis of $\alpha$ -acyloxyketones from benzylic secondary alcohols and carboxylic acids**

Minghui Zhu, Wei Wei\*, Daoshan Yang, Hong Cui, Huanhuan Cui, Xuejun Sun, Hua Wang\*

*The Key Laboratory of Life-Organic Analysis and Key Laboratory of Pharmaceutical Intermediates and Analysis of Natural Medicine, School of Chemistry and Chemical Engineering, Qufu Normal University, Qufu 273165, Shandong, China*

*\*Phone: +86 537 4458317; Fax: +86 537 4458317.*

*. E-mail: [weiweiqfnu@163.com](mailto:weiweiqfnu@163.com); [huawang\\_qfnu@126.com](mailto:huawang_qfnu@126.com)*

## **Contents**

|                                                                                                                                                       |         |
|-------------------------------------------------------------------------------------------------------------------------------------------------------|---------|
| 1. General information .....                                                                                                                          | S2      |
| 2. General procedure for NBS/DBU mediated one-pot synthesis of $\alpha$ -acyloxyketones<br>from benzylic secondary alcohols and carboxylic acids..... | S3      |
| 3. Preliminary mechanistic studies .....                                                                                                              | S3-S5   |
| 4. Characterization data of products <b>3aa–3as</b> , <b>6a</b> .....                                                                                 | S5-S14  |
| 5. Copies of NMR spectra for <b>3aa–3as</b> , <b>6a</b> .....                                                                                         | S15-S46 |

## 1. General information

All commercially available reagent grade chemicals were purchased from Aldrich, Acros, Alfa Aesar and Beijing Ouhe Chemical Company and used as received without further purification unless otherwise stated.  $^1\text{H}$  NMR,  $^{13}\text{C}$  NMR and  $^{31}\text{P}$  NMR were recorded in  $\text{CDCl}_3$  on a Bruker Avance III 400 spectrometer with TMS as internal standard (400 MHz  $^1\text{H}$ , 100 MHz  $^{13}\text{C}$  ) at room temperature, the chemical shifts ( $\delta$ ) were expressed in ppm and  $J$  values were given in Hz. The following abbreviations are used to indicate the multiplicity: singlet (s), doublet (d), triplet (t), quartet (q), doublet of doublets (dd), doublet of triplets (dt), and multiplet (m). All first order splitting patterns were assigned on the basis of the appearance of the multiplet. Splitting patterns that could not be easily interpreted were designated as multiplet (m). Mass analyses and HRMS were obtained on a Finnigan-LCQDECA mass spectrometer and a Bruker Daltonics Bio-TOF-Q mass spectrometer by the ESI method, respectively. Column chromatography was performed on silica gel (200-300 mesh).

## 2. General procedure for NBS/DBU mediated one-pot synthesis of $\alpha$ -acyloxyketones from benzylic secondary alcohols and carboxylic acids

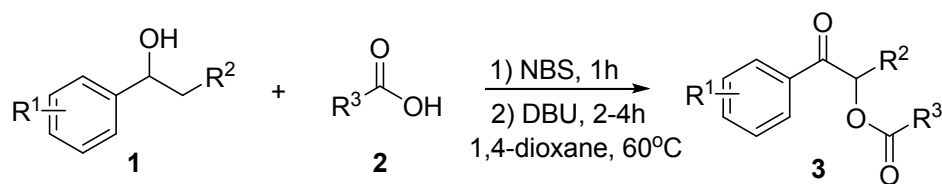

In a tube (25ml), alcohol **1** (0.25 mmol), carboxylic acid **2** (0.5 mmol), NBS (0.5 mmol), and 1,4-dioxane (2 mL) were added. Subsequently, the tube was sealed and the reaction vessel was allowed to stir at 60 °C for 1 h, then DBU (0.5 mmol) was added to reaction system. After another 2-4 hours, the reaction was stopped and the solution was concentrated under vacuum. The resulting mixture purified by flash column chromatography using a mixture of petroleum ether and ethyl acetate as eluent to give the desired product **3**.

### 3. Preliminary mechanistic studies.

(1) The reaction of **6a** and **2a** in the presence of DBU.

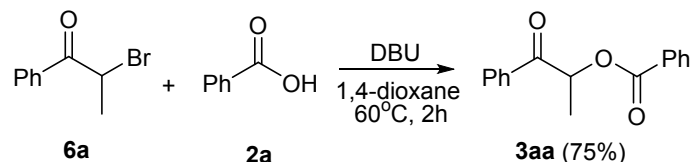

In a sealed tube (25ml),  $\alpha$ -bromo ketone **6a** (0.25 mmol), benzoic acid **2a** (0.25 mmol), and 1,4-dioxane (2 mL) were added. Then, the tube was sealed and the reaction vessel was allowed to stir at 60 °C for 2 h. After the reaction, the solution was concentrated in vacuum. The resulting mixture purified by flash column chromatography using a mixture of petroleum ether and ethyl acetate as eluent to give the desired product **3aa** in 75% yield.

(2) The reaction of 1-phenylpropan-1-ol **1a** with NBS

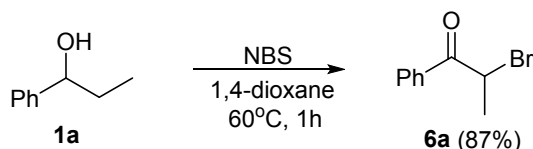

In a tube (25ml), 1-phenylpropan-1-ol **1a** (0.25 mmol), NBS (0.5 mmol), and 1,4-

dioxane (2 mL) were added. Then, the tube was sealed and the reaction vessel was allowed to stir at 60 °C for 1 h. After the reaction, the solution was concentrated in vacuum. The resulting mixture purified by flash column chromatography using a mixture of petroleum ether and ethyl acetate as eluent to give the desired  $\alpha$ -bromo ketone **6a** in 87% yield.

(3) The reaction of 1-phenylpropan-1-ol **1a** with Br<sub>2</sub>

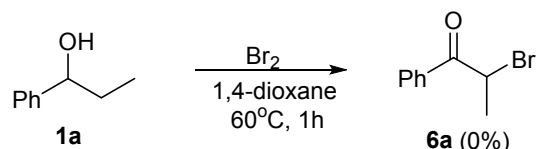

In a tube (25ml), 1-phenylpropan-1-ol **1a** (0.25 mmol), Br<sub>2</sub> (0.5 mmol), and 1,4-dioxane (2 mL) were added. Then, the tube was sealed and the reaction vessel was allowed to stir at 60 °C for 1 h. After the reaction, the solution was concentrated in vacuum. None of the desired  $\alpha$ -bromo ketone **6a** was detected.

(4) The reaction of propiophenone **5a** with Br<sub>2</sub>

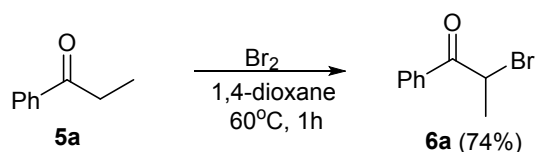

In a tube (25ml), propiophenone **5a** (0.25 mmol), Br<sub>2</sub> (0.5 mmol), and 1,4-dioxane (2 mL) were added. Then, the tube was sealed and the reaction vessel was allowed to stir at 60 °C for 1 h. After the reaction, the solution was concentrated in vacuum. The resulting mixture purified by flash column chromatography using a mixture of petroleum ether and ethyl acetate as eluent to give the desired  $\alpha$ -bromo ketone **6a** in 74% yield.

(4) The reaction of propiophenone **5a** with NBS

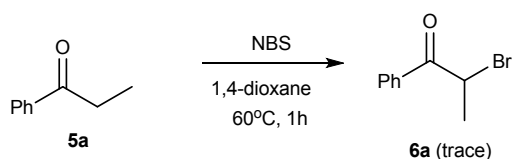

In a tube (25ml), propiophenone **5a** (0.25 mmol), NBS (0.5 mmol), and 1,4-

dioxane (2 mL) were added. Then, the tube was sealed and the reaction vessel was allowed to stir at 60 °C for 1 h. After the reaction, the solution was concentrated in vacuum. Only a trace amount of the desired  $\alpha$ -bromo ketone **6a** was detected.

(5) The reaction of propiophenone **5a** with benzoic acid **2a** under the standard conditions.

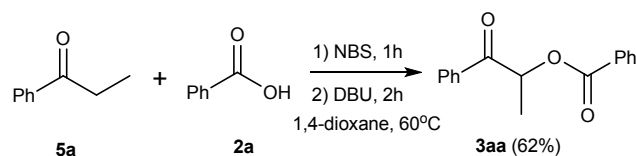

In a tube (25ml), propiophenone **5a** (0.25 mmol), benzoic acid **2a** (0.375 mmol), NBS (0.5 mmol), and 1,4-dioxane (2 mL) were added. Subsequently, the tube was sealed and the reaction vessel was allowed to stir at 60 °C for 1 h, then DBU (0.5 mmol) was added to reaction system. After another 2 hours, the reaction was stopped and the solution was concentrated under vacuum. The resulting mixture purified by flash column chromatography using a mixture of petroleum ether and ethyl acetate as eluent to give the desired product **3aa** in 62% yield.

(6) The reaction of 1-phenylpropan-1-ol **1a** with NBS under N<sub>2</sub>.

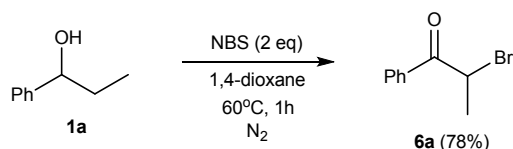

An oven-dried Schlenk tube was charged with a magnetic stir-bar, 1-phenylpropan-1-ol **1a** (0.25 mmol) and NBS (0.5 mmol). The tube was then evacuated and backfill with nitrogen. The evacuated/backfill sequence was repeated two additional times. Under a counter-flow of nitrogen, 1,4-dioxane (2 mL) was added. Then, the reaction vessel was allowed to stir at 60 °C for 1 h. After the reaction, the solution was concentrated in vacuum. The resulting mixture purified by flash column chromatography using a mixture of petroleum ether and ethyl acetate as eluent to give the desired  $\alpha$ -bromo ketone **6a** in 78% yield.

#### 4. Characterization data of products

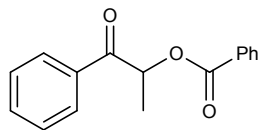

##### 1-oxo-1-phenylpropan-2-yl benzoate

Compound **3aa** was obtained in 99% yield according to the general procedure.  $^1\text{H}$  NMR ( $\text{CDCl}_3$ , 400 MHz, ppm):  $\delta$  8.12 (d,  $J = 7.1$  Hz, 2H), 8.03 (d,  $J = 7.1$  Hz, 2H), 7.63-7.58 (m, 2H), 7.53-7.45 (m, 4H), 6.24 (q,  $J = 7.0$  Hz, 3H), 1.70 (d,  $J = 7.0$  Hz, 3H);  $^{13}\text{C}$  NMR ( $\text{CDCl}_3$ , 100 MHz, ppm):  $\delta$  196.7, 166.0, 134.5, 133.6, 133.3, 129.9, 129.5, 128.8, 128.5, 128.4, 71.9, 17.2; HRMS calc. for  $\text{C}_{16}\text{H}_{14}\text{O}_3\text{Na}$  ( $\text{M}+\text{Na}$ ) $^+$ , 277.0841; found, 277.0846.

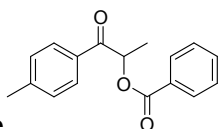

##### 1-oxo-1-p-tolylpropan-2-yl benzoate

Compound **3ba** was obtained in 89% yield according to the general procedure.  $^1\text{H}$  NMR ( $\text{CDCl}_3$ , 400 MHz, ppm):  $\delta$  8.11 (d,  $J = 7.0$  Hz, 2H), 7.93 (d,  $J = 8.2$  Hz, 2H), 7.60 (t,  $J = 7.4$  Hz, 1H), 7.47 (t,  $J = 7.9$  Hz, 2H), 7.31 (d,  $J = 8.0$  Hz, 2H), 6.22 (q,  $J = 7.0$  Hz, 1H), 2.44 (s, 3H), 1.69 (d,  $J = 7.0$  Hz, 3H);  $^{13}\text{C}$  NMR ( $\text{CDCl}_3$ , 100 MHz, ppm):  $\delta$  196.2, 166.0, 144.5, 133.2, 132.0, 129.9, 129.6, 129.5, 128.7, 128.4, 71.8, 21.7, 17.3; HRMS calc. for  $\text{C}_{17}\text{H}_{16}\text{O}_3\text{Na}$  ( $\text{M}+\text{Na}$ ) $^+$ , 291.0997; found, 291.0999.

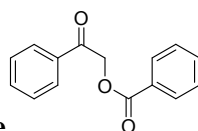

##### 2-oxo-2-phenylethyl benzoate

Compound **3ca** was obtained in 88% yield according to the general procedure.  $^1\text{H}$  NMR ( $\text{CDCl}_3$ , 400 MHz, ppm):  $\delta$  8.17 (d,  $J = 7.1$  Hz, 2H), 8.00 (d,  $J = 7.1$  Hz, 2H), 7.66-7.61 (m, 2H), 7.56-7.48 (m, 4H), 5.61 (s, 2H);  $^{13}\text{C}$  NMR ( $\text{CDCl}_3$ , 100 MHz, ppm):  $\delta$  192.3, 166.0, 134.4, 133.9, 133.3, 130.0, 128.9, 128.5, 127.9, 66.5; HRMS calc. for  $\text{C}_{15}\text{H}_{12}\text{O}_3\text{Na}$  ( $\text{M}+\text{Na}$ ) $^+$ , 263.0684; found, 263.0685.

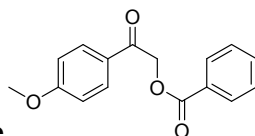

##### 2-(4-methoxyphenyl)-2-oxoethyl benzoate

Compound **3da** was obtained in 85% yield according to the general procedure.  $^1\text{H}$  NMR ( $\text{CDCl}_3$ , 400 MHz, ppm):  $\delta$  8.17 (d,  $J = 7.1$  Hz, 2H), 7.98 (d,  $J = 6.9$  Hz, 2H), 7.62 (t,  $J = 7.5$  Hz, 1H), 7.49 (t,  $J = 7.8$  Hz, 2H), 7.00 (d,  $J = 6.9$  Hz, 2H), 5.57 (s, 2H),

3.91 (s, 3H);  $^{13}\text{C}$  NMR ( $\text{CDCl}_3$ , 100 MHz, ppm):  $\delta$  190.6, 166.1, 164.1, 133.3, 130.2, 130.0, 129.6, 128.4, 127.4, 114.1, 66.2, 55.5; HRMS calc. for  $\text{C}_{16}\text{H}_{14}\text{O}_4\text{Na}$  ( $\text{M}+\text{Na}$ ) $^+$ , 293.0790; found, 293.0791.

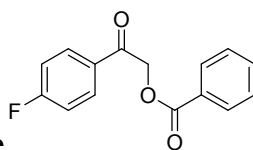

### 2-(4-fluorophenyl)-2-oxoethyl benzoate

Compound **3ea** was obtained in 69% yield according to the general procedure.  $^1\text{H}$  NMR ( $\text{CDCl}_3$ , 400 MHz, ppm):  $\delta$  8.16 (d,  $J = 7.1$  Hz, 2H), 8.06-8.02 (m, 2H), 7.63 (t,  $J = 7.5$  Hz, 1H), 7.50 (t,  $J = 7.9$  Hz, 2H), 7.21 (t,  $J = 8.6$  Hz, 2H), 5.57 (s, 2H);  $^{13}\text{C}$  NMR ( $\text{CDCl}_3$ , 100 MHz, ppm):  $\delta$  190.7, 166.2 (d,  $J = 254.5$  Hz), 166.1, 133.4, 130.8 (d,  $J = 2.9$  Hz), 130.6 (d,  $J = 9.4$  Hz), 130.0, 129.3, 128.5, 116.1 (d,  $J = 21.9$  Hz), 66.3; HRMS calc. for  $\text{C}_{15}\text{H}_{11}\text{O}_3\text{FNa}$  ( $\text{M}+\text{Na}$ ) $^+$ , 281.0590; found, 281.0593.

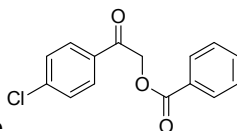

### 2-(4-chlorophenyl)-2-oxoethyl benzoate

Compound **3fa** was obtained in 85% yield according to the general procedure.  $^1\text{H}$  NMR ( $\text{CDCl}_3$ , 400 MHz, ppm):  $\delta$  8.16 (d,  $J = 7.1$  Hz, 2H), 7.94 (d,  $J = 8.6$  Hz, 2H), 7.63 (t,  $J = 7.4$  Hz, 1H), 7.52-7.48 (m, 3H), 5.56 (s, 2H);  $^{13}\text{C}$  NMR ( $\text{CDCl}_3$ , 100 MHz, ppm):  $\delta$  191.1, 166.0, 140.4, 133.4, 132.7, 130.0, 129.3, 129.2, 128.5, 66.3; HRMS calc. for  $\text{C}_{15}\text{H}_{11}\text{O}_3\text{ClNa}$  ( $\text{M}+\text{Na}$ ) $^+$ , 297.0294; found, 297.0291.

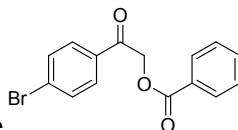

### 2-(4-bromophenyl)-2-oxoethyl benzoate

Compound **3ga** was obtained in 66% yield according to the general procedure.  $^1\text{H}$  NMR ( $\text{CDCl}_3$ , 400 MHz, ppm):  $\delta$  8.17-8.15 (m, 2H), 7.86 (d,  $J = 8.6$  Hz, 2H), 7.68 (d,  $J = 8.6$  Hz, 2H), 7.63 (t,  $J = 7.4$  Hz, 1H), 7.50 (t,  $J = 7.9$  Hz, 2H), 5.55 (s, 2H);  $^{13}\text{C}$  NMR ( $\text{CDCl}_3$ , 100 MHz, ppm):  $\delta$  191.3, 166.0, 133.4, 133.1, 132.3, 130.0, 129.3, 129.3, 129.2, 128.5, 66.3; HRMS calc. for  $\text{C}_{15}\text{H}_{11}\text{O}_3\text{BrNa}$  ( $\text{M}+\text{Na}$ ) $^+$ , 340.9789; found, 340.9791.

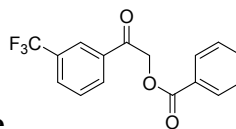

### 2-oxo-2-(3-(trifluoromethyl)phenyl)ethyl benzoate

Compound **3ha** was obtained in 55% yield according to the general procedure.  $^1\text{H}$  NMR ( $\text{CDCl}_3$ , 400 MHz, ppm):  $\delta$  8.26 (s, 1H), 8.19-8.14 (m, 3H), 7.91 (d,  $J = 7.8$  Hz,

1H), 7.69 (t,  $J = 7.8$  Hz, 1H), 7.66-7.62 (m, 1H), 7.51 (t,  $J = 7.9$  Hz, 2H), 5.60 (s, 2H);  $^{13}\text{C}$  NMR ( $\text{CDCl}_3$ , 100 MHz, ppm):  $\delta$  191.2, 166.0, 134.9, 133.5, 131.6 (d,  $J = 33.0$  Hz), 131.0, 130.3 (q,  $J = 3.4$  Hz, Hz), 130.0, 129.6, 129.2, 128.5, 128.4, 124.8 (d,  $J = 4.1$  Hz), 66.4; HRMS calc. for  $\text{C}_{16}\text{H}_{11}\text{O}_3\text{F}_3\text{Na}$  ( $\text{M}+\text{Na}$ ) $^+$ , 331.0558; found, 331.0561.

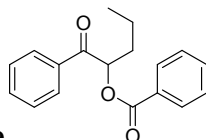

### 1-oxo-1-phenylpentan-2-yl benzoate

Compound **3ia** was obtained in 92% yield according to the general procedure.  $^1\text{H}$  NMR ( $\text{CDCl}_3$ , 400 MHz, ppm):  $\delta$  8.13 (d,  $J = 7.1$  Hz, 2H), 8.03 ( $J = 7.2$  Hz, 2H), 7.62-7.59 (m, 2H), 7.54-7.46 (m, 4H), 6.14 (dd,  $J_1 = 5.4$  Hz,  $J_2 = 7.9$  Hz, 1H), 2.04-1.99 (m, 2H), 1.66-1.59 (m, 2H), 1.03 (t,  $J = 7.4$  Hz, 3H);  $^{13}\text{C}$  NMR ( $\text{CDCl}_3$ , 100 MHz, ppm):  $\delta$  196.5, 166.2, 134.9, 133.5, 133.2, 129.9, 129.6, 128.8, 128.5, 128.4, 75.6, 33.5, 19.0, 13.8; HRMS calc. for  $\text{C}_{18}\text{H}_{18}\text{O}_3\text{Na}$  ( $\text{M}+\text{Na}$ ) $^+$ , 305.1154; found, 305.1155.

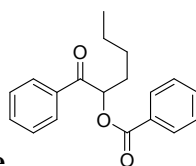

### 1-oxo-1-phenylhexan-2-yl benzoate

Compound **3ja** was obtained in 91% yield according to the general procedure.  $^1\text{H}$  NMR ( $\text{CDCl}_3$ , 400 MHz, ppm):  $\delta$  8.13 (d,  $J = 7.1$  Hz, 2H), 8.03 (d,  $J = 7.1$  Hz, 2H), 7.64-7.59 (m, 2H), 7.54-7.47 (m, 4H), 6.12 (t,  $J = 6.2$  Hz, 1H), 2.06-2.01 (m, 2H), 1.59-1.53 (m, 2H), 1.46-1.39 (m, 2H), 0.95 (t,  $J = 7.3$  Hz, 3H);  $^{13}\text{C}$  NMR ( $\text{CDCl}_3$ , 100 MHz, ppm):  $\delta$  196.5, 166.2, 135.0, 133.5, 133.2, 129.9, 129.6, 128.8, 128.5, 128.4, 75.8, 31.2, 27.7, 22.4, 13.8; HRMS calc. for  $\text{C}_{19}\text{H}_{20}\text{O}_3\text{Na}$  ( $\text{M}+\text{Na}$ ) $^+$ , 319.1310; found, 319.1311.

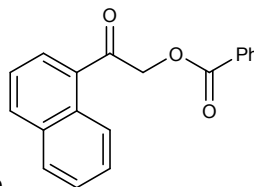

### 2-(naphthalen-2-yl)-2-oxoethyl benzoate

Compound **3ka** was obtained in 70% yield according to the general procedure.  $^1\text{H}$  NMR ( $\text{CDCl}_3$ , 400 MHz, ppm):  $\delta$  8.71 (d,  $J = 8.6$  Hz, 1H), 8.18 (t,  $J = 7.1$  Hz, 2H), 8.07 (d,  $J = 8.3$  Hz, 1H), 7.98 (dd,  $J_1 = 0.9$  Hz,  $J_2 = 7.2$  Hz, 1H), 7.92 (d,  $J = 7.6$  Hz, 1H), 7.65-7.61 (m, 2H), 7.59-7.56 (m, 2H), 7.50 (t,  $J = 7.8$  Hz, 1H), 5.59 (s, 2H);  $^{13}\text{C}$  NMR ( $\text{CDCl}_3$ , 100 MHz, ppm):  $\delta$  196.0, 166.1, 134.0, 133.5, 133.4, 132.5, 130.3,



130.2, 130.0, 129.5, 128.5, 128.4, 127.5, 126.8, 125.7, 124.3, 67.9; HRMS calc. for  $C_{19}H_{14}O_3Na$  ( $M+Na$ )<sup>+</sup>, 313.0841; found, 313.0844.

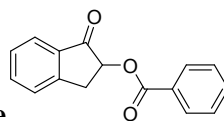

**1-oxo-2,3-dihydro-1H-inden-2-yl benzoate**

Compound **3la** was obtained in 88% yield according to the general procedure. <sup>1</sup>H NMR (CDCl<sub>3</sub>, 400 MHz, ppm): δ 8.12 (d,  $J = 7.1$  Hz, 2H), 7.87 (d,  $J = 7.7$  Hz, 1H), 7.70 (dt,  $J_1 = 1.1$  Hz,  $J_2 = 7.6$  Hz, 1H), 7.63-7.59 (m, 1H), 7.52-7.46 (m, 4H), 5.67 (dd,  $J_1 = 4.8$  Hz,  $J_2 = 8.0$  Hz, 1H), 3.80 (dd,  $J_1 = 8.0$  Hz,  $J_2 = 17.0$  Hz, 1H), 3.23 (dd,  $J_1 = 4.8$  Hz,  $J_2 = 17.0$  Hz, 1H); <sup>13</sup>C NMR (CDCl<sub>3</sub>, 100 MHz, ppm): δ 200.4, 166.1, 150.4, 135.9, 134.7, 133.4, 130.0, 129.4, 128.4, 128.2, 126.7, 124.6, 74.5, 33.6; HRMS calc. for  $C_{16}H_{12}O_3Na$  ( $M+Na$ )<sup>+</sup>, 275.0684; found, 275.0685.

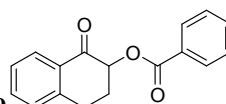

**1-oxo-1,2,3,4-tetrahydronaphthalen-2-yl benzoate**

Compound **3ma** was obtained in 92% yield according to the general procedure. <sup>1</sup>H NMR (CDCl<sub>3</sub>, 400 MHz, ppm): δ 8.19-8.16 (m, 2H), 8.09 (dd,  $J_1 = 1.1$  Hz,  $J_2 = 7.8$  Hz, 1H), 7.64-7.59 (m, 1H), 7.56 (dt,  $J_1 = 1.4$  Hz,  $J_2 = 7.5$  Hz, 1H), 7.49 (t,  $J = 7.8$  Hz, 2H), 7.38 (t,  $J = 7.6$  Hz, 1H), 7.32 (d,  $J = 7.7$  Hz, 1H), 5.83 (dd,  $J_1 = 5.2$  Hz,  $J_2 = 13.2$  Hz, 1H), 3.36-3.28 (m, 1H), 3.21-3.15 (m, 1H), 2.60-2.54 (m, 1H), 2.52-2.41 (m, 1H); <sup>13</sup>C NMR (CDCl<sub>3</sub>, 100 MHz, ppm): δ 192.8, 165.8, 143.1, 133.9, 133.2, 131.7, 129.9, 129.8, 128.7, 128.4, 127.9, 127.0, 75.0, 29.3, 28.0; HRMS calc. for  $C_{17}H_{14}O_3Na$  ( $M+Na$ )<sup>+</sup>, 289.0841; found, 289.0845.

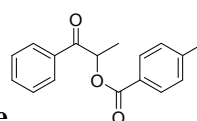

**1-oxo-1-phenylpropan-2-yl 4-methylbenzoate**

Compound **3ab** was obtained in 90% yield according to the general procedure. <sup>1</sup>H NMR (CDCl<sub>3</sub>, 400 MHz, ppm): δ 8.04-7.99 (m, 4H), 7.61 (t,  $J = 7.4$  Hz, 1H), 7.51 (t,  $J = 7.8$  Hz, 2H), 7.28 (d,  $J = 8.0$  Hz, 2H), 6.21 (q,  $J = 7.0$  Hz, 1H), 2.44 (s, 3H), 1.69 (d,  $J = 7.0$  Hz, 3H); <sup>13</sup>C NMR (CDCl<sub>3</sub>, 100 MHz, ppm): δ 196.9, 166.1, 144.1, 134.5, 133.6, 129.9, 129.1, 128.8, 128.6, 126.7, 71.7, 21.7, 17.2; HRMS calc. for  $C_{17}H_{16}O_3Na$  ( $M+Na$ )<sup>+</sup>, 291.0997; found, 291.0993.

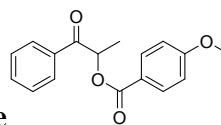

### 1-oxo-1-phenylpropan-2-yl 4-methoxybenzoate

Compound **3ac** was obtained in 91% yield according to the general procedure.  $^1\text{H}$  NMR ( $\text{CDCl}_3$ , 400 MHz, ppm):  $\delta$  8.08-8.01 (m, 4H), 7.61 (t,  $J = 7.4$  Hz, 1H), 7.51 (t,  $J = 7.8$  Hz, 2H), 6.94 (d,  $J = 9.0$  Hz, 2H), 6.20 (q,  $J = 7.0$  Hz, 1H), 3.89 (s, 3H), 1.68 (d,  $J = 7.0$  Hz, 3H);  $^{13}\text{C}$  NMR ( $\text{CDCl}_3$ , 100 MHz, ppm):  $\delta$  197.0, 165.7, 163.7, 134.6, 133.5, 132.0, 128.8, 128.6, 121.9, 113.7, 71.6, 55.5, 17.2; HRMS calc. for  $\text{C}_{17}\text{H}_{16}\text{O}_4\text{Na}$  ( $\text{M}+\text{Na}$ ) $^+$ , 307.0946; found, 307.0944.

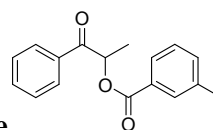

### 1-oxo-1-phenylpropan-2-yl 3-methylbenzoate

Compound **3ad** was obtained in 93% yield according to the general procedure.  $^1\text{H}$  NMR ( $\text{CDCl}_3$ , 400 MHz, ppm):  $\delta$  8.03 (d,  $J = 7.8$  Hz, 2H), 7.92 (d,  $J = 9.0$  Hz, 2H), 7.62 (t,  $J = 7.2$  Hz, 1H), 7.51 (t,  $J = 7.8$  Hz, 2H), 7.41 (d,  $J = 7.6$  Hz, 1H), 7.36 (t,  $J = 7.5$  Hz, 1H), 6.23 (q,  $J = 7.0$  Hz, 1H), 2.43 (s, 3H), 1.70 (d,  $J = 7.0$  Hz, 3H);  $^{13}\text{C}$  NMR ( $\text{CDCl}_3$ , 100 MHz, ppm):  $\delta$  196.8, 166.2, 138.2, 134.5, 134.1, 133.6, 130.4, 129.4, 128.8, 128.6, 128.3, 127.1, 71.8, 21.3, 17.2; HRMS calc. for  $\text{C}_{17}\text{H}_{16}\text{O}_3\text{Na}$  ( $\text{M}+\text{Na}$ ) $^+$ , 291.0997; found, 291.0991.

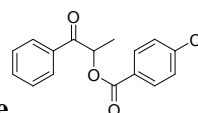

### 1-oxo-1-phenylpropan-2-yl 4-chlorobenzoate

Compound **3ae** was obtained in 92% yield according to the general procedure.  $^1\text{H}$  NMR ( $\text{CDCl}_3$ , 400 MHz, ppm):  $\delta$  8.07-8.01 (m, 4H), 7.63 (t,  $J = 7.4$  Hz, 1H), 7.52 (t,  $J = 7.8$  Hz, 2H), 7.45 (d,  $J = 8.6$  Hz, 2H), 6.22 (q,  $J = 7.0$  Hz, 1H), 1.70 (d,  $J = 7.0$  Hz, 3H);  $^{13}\text{C}$  NMR ( $\text{CDCl}_3$ , 100 MHz, ppm):  $\delta$  196.5, 165.1, 139.8, 134.3, 133.7, 131.3, 128.9, 128.8, 128.5, 128.0, 72.1, 17.2; HRMS calc. for  $\text{C}_{16}\text{H}_{13}\text{O}_3\text{ClNa}$  ( $\text{M}+\text{Na}$ ) $^+$ , 311.0451; found, 311.0453.

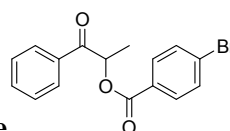

### 1-oxo-1-phenylpropan-2-yl 4-bromobenzoate

Compound **3af** was obtained in 90% yield according to the general procedure.  $^1\text{H}$  NMR ( $\text{CDCl}_3$ , 400 MHz, ppm):  $\delta$  8.02-7.97 (m, 4H), 7.64-7.60 (m, 3H), 7.52 (t,  $J = 7.9$  Hz, 2H), 6.22 (q,  $J = 7.0$  Hz, 1H), 1.69 (d,  $J = 7.0$  Hz, 3H);  $^{13}\text{C}$  NMR ( $\text{CDCl}_3$ , 100

MHz, ppm):  $\delta$  196.5, 165.3, 134.3, 133.7, 131.8, 131.4, 128.9, 128.5, 128.4, 72.1, 17.3; HRMS calc. for  $C_{16}H_{13}O_3BrNa$  ( $M+Na$ )<sup>+</sup>, 354.9946; found, 354.9949.

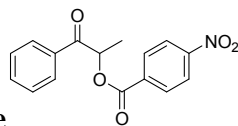

### 1-oxo-1-phenylpropan-2-yl 4-nitrobenzoate

Compound **3ag** was obtained in 92% yield according to the general procedure. <sup>1</sup>H NMR ( $CDCl_3$ , 400 MHz, ppm):  $\delta$  8.35-8.29 (m, 4H), 8.01 (t,  $J = 7.2$  Hz, 2H), 7.66 (t,  $J = 7.4$  Hz, 1H), 7.54 (t,  $J = 7.9$  Hz, 2H), 6.28 (q,  $J = 7.0$  Hz, 1H), 1.74 (d,  $J = 7.0$  Hz, 3H); <sup>13</sup>C NMR ( $CDCl_3$ , 100 MHz, ppm):  $\delta$  196.0, 164.2, 150.8, 135.0, 134.2, 133.9, 131.0, 129.0, 128.5, 123.6, 72.8, 17.3; HRMS calc. for  $C_{16}H_{13}NO_5Na$  ( $M+Na$ )<sup>+</sup>, 322.0691, found, 322.0693.

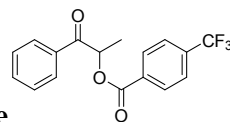

### 1-oxo-1-phenylpropan-2-yl 4-(trifluoromethyl)benzoate

Compound **3ah** was obtained in 72% yield according to the general procedure. <sup>1</sup>H NMR ( $CDCl_3$ , 400 MHz, ppm):  $\delta$  8.24 (d,  $J = 8.0$  Hz, 2H), 8.01 (d,  $J = 7.2$  Hz, 2H), 7.74 (d,  $J = 8.2$  Hz, 2H), 7.64 (t,  $J = 7.3$  Hz, 1H), 7.53 (t,  $J = 7.8$  Hz, 2H), 6.26 (q,  $J = 7.0$  Hz, 1H), 1.72 (d,  $J = 7.0$  Hz, 3H); <sup>13</sup>C NMR ( $CDCl_3$ , 100 MHz, ppm):  $\delta$  196.3, 164.8, 134.7 (d,  $J = 32.5$  Hz), 134.3, 133.8, 132.8, 130.3, 128.9, 128.5, 125.5 (q,  $J = 3.7$  Hz), 123.6 (d,  $J = 271.1$  Hz), 72.4, 17.3; HRMS calc. for  $C_{17}H_{13}O_3F_3Na$  ( $M+Na$ )<sup>+</sup>, 345.0714; found, 345.0717.

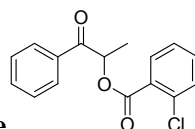

### 1-oxo-1-phenylpropan-2-yl 2-chlorobenzoate

Compound **3ai** was obtained in 93% yield according to the general procedure. <sup>1</sup>H NMR ( $CDCl_3$ , 400 MHz, ppm):  $\delta$  8.02 (t,  $J = 7.4$  Hz, 2H), 7.98 (d,  $J = 7.1$  Hz, 1H), 7.64 (t,  $J = 7.3$  Hz, 1H), 7.53 (t,  $J = 7.9$  Hz, 2H), 7.50-7.44 (m, 2H), 7.38-7.34 (m, 1H), 6.27 (q,  $J = 7.0$  Hz, 1H), 1.69 (d,  $J = 7.0$  Hz, 3H); <sup>13</sup>C NMR ( $CDCl_3$ , 100 MHz, ppm):  $\delta$  196.4, 164.9, 134.1, 133.6, 132.8, 131.8, 131.1, 129.4, 128.8, 128.5, 126.6, 72.3, 17.1; HRMS calc. for  $C_{16}H_{13}O_3ClNa$  ( $M+Na$ )<sup>+</sup>, 311.0451; found, 311.0553.

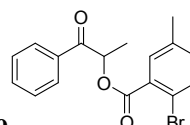

### 1-oxo-1-phenylpropan-2-yl 2-bromo-5-methylbenzoate

Compound **3aj** was obtained in 88% yield according to the general procedure. <sup>1</sup>H NMR ( $CDCl_3$ , 400 MHz, ppm):  $\delta$  8.03 (d,  $J = 7.7$  Hz, 2H), 7.76 (d,  $J = 1.9$  Hz, 1H),

7.63 (t,  $J = 7.2$  Hz, 1H), 7.56-7.51 (m, 3H), 7.18 (dd,  $J_1 = 2.2$  Hz,  $J_2 = 8.2$  Hz, 1H), 6.27 (q,  $J = 7.0$  Hz, 1H), 2.37 (s, 3H), 1.69 (d,  $J = 7.0$  Hz, 3H);  $^{13}\text{C}$  NMR ( $\text{CDCl}_3$ , 100 MHz, ppm):  $\delta$  196.5, 165.6, 137.4, 134.4, 134.1, 133.8, 133.7, 132.3, 131.0, 128.8, 128.6, 118.5, 72.3, 20.8, 17.2; HRMS calc. for  $\text{C}_{17}\text{H}_{15}\text{O}_3\text{BrNa}$  ( $\text{M}+\text{Na}$ ) $^+$ , 369.0102; found, 369.0104.

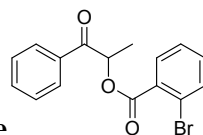

### 1-oxo-1-phenylpropan-2-yl 2-bromobenzoate

Compound **3ak** was obtained in 84% yield according to the general procedure.  $^1\text{H}$  NMR ( $\text{CDCl}_3$ , 400 MHz, ppm):  $\delta$  8.01 (d,  $J = 7.2$  Hz, 2H), 7.97 (dd,  $J_1 = 2.0$  Hz,  $J_2 = 7.6$  Hz, 1H), 7.69 (dd,  $J_1 = 1.2$  Hz,  $J_2 = 7.6$  Hz, 1H), 7.63 (t,  $J = 7.4$  Hz, 1H), 7.52 (t,  $J = 7.8$  Hz, 2H), 7.43-7.37 (m, 2H), 6.27 (q,  $J = 7.0$  Hz, 1H), 1.69 (d,  $J = 7.0$  Hz, 3H);  $^{13}\text{C}$  NMR ( $\text{CDCl}_3$ , 100 MHz, ppm):  $\delta$  196.4, 165.4, 134.4, 134.4, 133.7, 132.8, 131.8, 131.4, 128.8, 128.5, 127.2, 121.9, 72.4, 17.1; HRMS calc. for  $\text{C}_{16}\text{H}_{13}\text{O}_3\text{BrNa}$  ( $\text{M}+\text{Na}$ ) $^+$ , 354.9946; found, 354.9949.

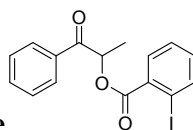

### 1-oxo-1-phenylpropan-2-yl 2-iodobenzoate

Compound **3al** was obtained in 78% yield according to the general procedure.  $^1\text{H}$  NMR ( $\text{CDCl}_3$ , 400 MHz, ppm):  $\delta$  8.02 (d,  $J = 7.2$  Hz, 3H), 7.99 (dd,  $J_1 = 1.7$  Hz,  $J_2 = 7.8$  Hz, 1H), 7.66-7.61 (m, 1H), 7.53 (t,  $J = 7.8$  Hz, 2H), 7.45 (dt,  $J_1 = 1.1$  Hz,  $J_2 = 7.6$  Hz, 1H), 7.20 (dt,  $J_1 = 1.7$  Hz,  $J_2 = 7.7$  Hz, 1H), 6.28 (q,  $J = 7.0$  Hz, 1H), 1.70 (d,  $J = 7.0$  Hz, 3H);  $^{13}\text{C}$  NMR ( $\text{CDCl}_3$ , 100 MHz, ppm):  $\delta$  196.4, 165.8, 141.4, 134.3, 134.2, 133.7, 133.0, 131.6, 128.9, 128.6, 128.0, 94.3, 72.5, 17.2; HRMS calc. for  $\text{C}_{16}\text{H}_{13}\text{O}_3\text{INa}$  ( $\text{M}+\text{Na}$ ) $^+$ , 402.9807; found, 402.9809.

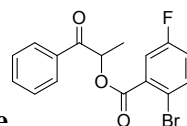

### 1-oxo-1-phenylpropan-2-yl 2-bromo-5-fluorobenzoate

Compound **3am** was obtained in 78% yield according to the general procedure.  $^1\text{H}$  NMR ( $\text{CDCl}_3$ , 400 MHz, ppm):  $\delta$  8.01 (d,  $J = 7.1$  Hz, 2H), 7.71 (dd,  $J_1 = 3.1$  Hz,  $J_2 = 8.6$  Hz, 1H), 7.67-7.62 (m, 2H), 7.53 (t,  $J = 7.9$  Hz, 2H), 7.14-7.09 (m, 1H), 6.26 (q,  $J = 7.0$  Hz, 1H), 1.70 (d,  $J = 7.0$  Hz, 3H);  $^{13}\text{C}$  NMR ( $\text{CDCl}_3$ , 100 MHz, ppm):  $\delta$  196.1, 164.3, 161.2 (d,  $J = 245.7$  Hz), 135.8 (d,  $J = 7.5$  Hz), 134.2, 133.8, 132.7 (d,  $J = 7.4$

Hz), 128.9, 128.5, 120.3 (d,  $J = 22.1$  Hz), 119.0 (d,  $J = 24.5$  Hz), 116.3 (d,  $J = 3.6$  Hz), 72.7, 17.2; HRMS calc. for  $C_{16}H_{12}O_3BrFNa$  ( $M+Na$ )<sup>+</sup>, 372.9852; found, 372.9857.

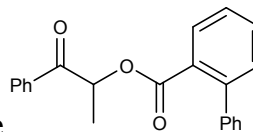

### 1-oxo-1-phenylpropan-2-yl biphenyl-2-carboxylate

Compound **3an** was obtained in 82% yield according to the general procedure. <sup>1</sup>H NMR ( $CDCl_3$ , 400 MHz, ppm):  $\delta$  7.97-7.92 (m, 3H), 7.61-7.55 (m, 2H), 7.50-7.45 (m, 3H), 7.41-7.35 (m, 6H), 5.96 (q,  $J = 7.0$  Hz, 1H), 1.32 (d,  $J = 7.0$  Hz, 3H); <sup>13</sup>C NMR ( $CDCl_3$ , 100 MHz, ppm):  $\delta$  196.5, 167.6, 143.0, 141.4, 134.4, 133.5, 131.6, 130.8, 130.4, 130.0, 128.7, 128.6, 128.5, 128.0, 127.2, 127.2, 72.0, 16.8; HRMS calc. for  $C_{22}H_{18}O_3Na$  ( $M+Na$ )<sup>+</sup>, 353.1154; found, 353.1151.

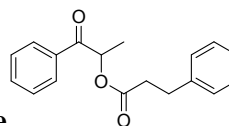

### 1-oxo-1-phenylpropan-2-yl 3-phenylpropanoate

Compound **3ao** was obtained in 93% yield according to the general procedure. <sup>1</sup>H NMR ( $CDCl_3$ , 400 MHz, ppm):  $\delta$  7.96 (d,  $J = 7.2$  Hz, 2H), 7.62 (t,  $J = 7.4$  Hz, 1H), 7.50 (t,  $J = 7.9$  Hz, 2H), 7.31 (t,  $J = 7.6$  Hz, 2H), 7.24-7.22 (m, 3H), 6.00 (q,  $J = 7.0$  Hz, 1H), 3.00 (t,  $J = 7.9$  Hz, 2H), 2.80-2.75 (m, 2H), 1.54 (d,  $J = 7.0$  Hz, 3H); <sup>13</sup>C NMR ( $CDCl_3$ , 100 MHz, ppm):  $\delta$  196.9, 172.3, 140.4, 134.4, 133.6, 128.8, 128.5, 128.5, 128.3, 126.3, 71.4, 35.5, 30.8, 17.1; HRMS calc. for  $C_{18}H_{18}O_3Na$  ( $M+Na$ )<sup>+</sup>, 305.1154; found, 305.1157.

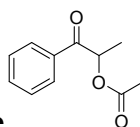

### 1-oxo-1-phenylpropan-2-yl acetate

Compound **3ap** was obtained in 84% yield according to the general procedure. <sup>1</sup>H NMR ( $CDCl_3$ , 400 MHz, ppm):  $\delta$  7.97 (d,  $J = 7.2$  Hz, 2H), 7.62 (t,  $J = 7.5$  Hz, 1H), 7.51 (t,  $J = 7.8$  Hz, 2H), 5.99 (q,  $J = 7.0$  Hz, 1H), 2.17 (s, 3H), 1.56 (d,  $J = 7.1$  Hz, 3H); <sup>13</sup>C NMR ( $CDCl_3$ , 100 MHz, ppm):  $\delta$  196.9, 170.4, 134.5, 133.5, 128.8, 128.5, 71.4, 20.7, 17.1; HRMS calc. for  $C_{11}H_{12}O_3Na$  ( $M+Na$ )<sup>+</sup>, 215.0684; found, 215.0682.

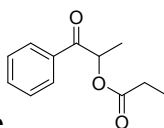

### 1-oxo-1-phenylpropan-2-yl propionate

Compound **3aq** was obtained in 85% yield according to the general procedure.  $^1\text{H}$  NMR ( $\text{CDCl}_3$ , 400 MHz, ppm):  $\delta$  7.97 (d,  $J = 7.7$  Hz, 2H), 7.61 (t,  $J = 7.3$  Hz, 1H), 7.50 (t,  $J = 7.8$  Hz, 2H), 6.00 (q,  $J = 7.0$  Hz, 1H), 2.47-2.43 (m, 2H), 1.55 (d,  $J = 7.0$  Hz, 3H), 1.18 (t,  $J = 7.0$  Hz, 3H);  $^{13}\text{C}$  NMR ( $\text{CDCl}_3$ , 100 MHz, ppm):  $\delta$  197.1, 173.9, 134.6, 133.5, 128.7, 128.4, 71.2, 27.3, 17.1, 8.9; HRMS calc. for  $\text{C}_{12}\text{H}_{14}\text{O}_3\text{Na}$  ( $\text{M}+\text{Na}$ ) $^+$ , 229.0841; found, 229.0845.

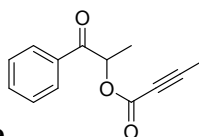

### 1-oxo-1-phenylpropan-2-yl but-2-ynoate

Compound **3ar** was obtained in 90% yield according to the general procedure.  $^1\text{H}$  NMR ( $\text{CDCl}_3$ , 400 MHz, ppm):  $\delta$  7.96 (d,  $J = 8.1$  Hz, 2H), 7.63 (t,  $J = 7.4$  Hz, 1H), 7.51 (t,  $J = 7.9$  Hz, 2H), 6.05 (q,  $J = 7.0$  Hz, 1H), 2.03 (s, 3H), 1.60 (d,  $J = 7.0$  Hz, 3H);  $^{13}\text{C}$  NMR ( $\text{CDCl}_3$ , 100 MHz, ppm):  $\delta$  195.7, 152.8, 134.1, 133.7, 128.8, 128.5, 87.1, 72.7, 71.9, 17.1, 3.9; HRMS calc. for  $\text{C}_{13}\text{H}_{12}\text{O}_3\text{Na}$  ( $\text{M}+\text{Na}$ ) $^+$ , 239.0684; found, 239.0687.

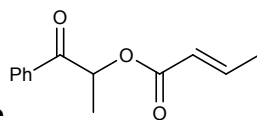

### (*E*)-1-oxo-1-phenylpropan-2-yl but-2-enoate

Compound **3as** was obtained in 50% yield according to the general procedure.  $^1\text{H}$  NMR ( $\text{CDCl}_3$ , 500 MHz, ppm):  $\delta$  7.98 (d,  $J = 7.2$  Hz, 2H), 7.61 (t,  $J = 7.4$  Hz, 1H), 7.50 (t,  $J = 7.9$  Hz, 2H), 7.11-7.04 (m, 1H), 6.05 (q,  $J = 7.0$  Hz, 1H), 5.96 (dq,  $J_1 = 1.6$  Hz,  $J_2 = 15.6$  Hz, 1H), 1.91 (dd,  $J_1 = 1.7$  Hz,  $J_2 = 7.0$  Hz, 3H), 1.58 (d,  $J = 7.0$  Hz, 3H);  $^{13}\text{C}$  NMR ( $\text{CDCl}_3$ , 125 MHz, ppm):  $\delta$  197.0, 165.7, 146.1, 134.5, 133.5, 128.8, 128.5, 121.9, 71.1, 18.1, 17.1; HRMS calc. for  $\text{C}_{13}\text{H}_{14}\text{O}_3\text{Na}$  ( $\text{M}+\text{Na}$ ) $^+$ , 241.0841; found, 241.0845.

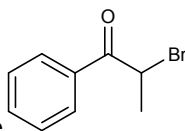

### 2-bromo-1-phenylpropan-1-one

$^1\text{H}$  NMR ( $\text{CDCl}_3$ , 400 MHz, ppm):  $\delta$  8.05 (t,  $J = 7.2$  Hz, 2H), 7.62 (t,  $J = 7.4$  Hz, 1H), 7.52 (t,  $J = 7.8$  Hz, 2H), 5.3 (q,  $J = 6.6$  Hz, 1H), 1.93 (d,  $J = 6.6$  Hz, 2H);  $^{13}\text{C}$  NMR ( $\text{CDCl}_3$ , 100 MHz, ppm):  $\delta$  193.3, 134.1, 133.6, 128.9, 128.7, 41.5, 20.1.

HRMS calc. for  $\text{C}_9\text{H}_9\text{BrONa}$  ( $\text{M}+\text{Na}$ ) $^+$ , 234.9734; found, 234.9729.

## 5. Copies of NMR spectra for 3aa–3as, 6a

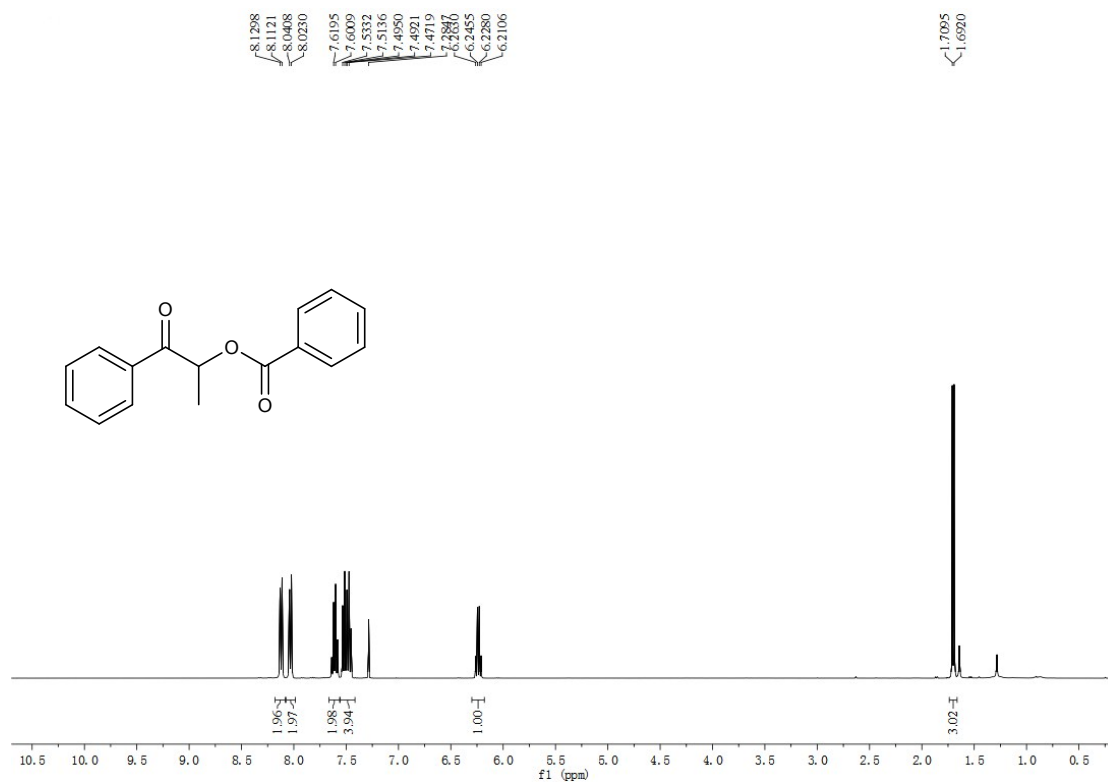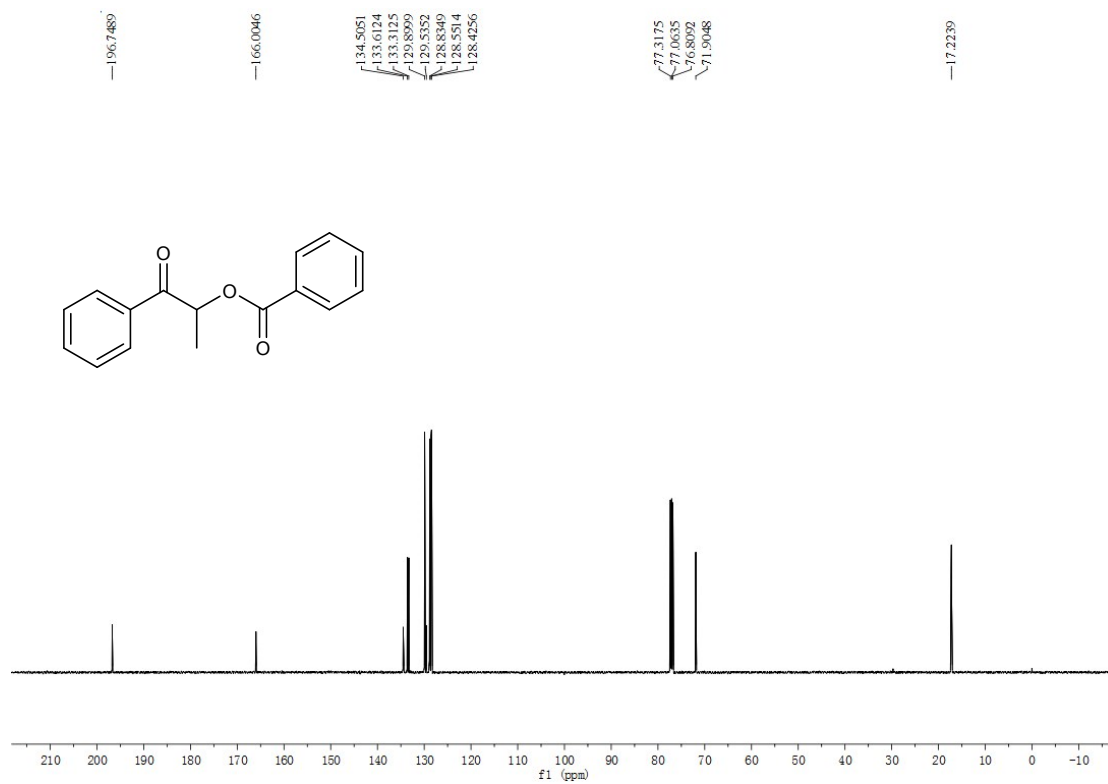

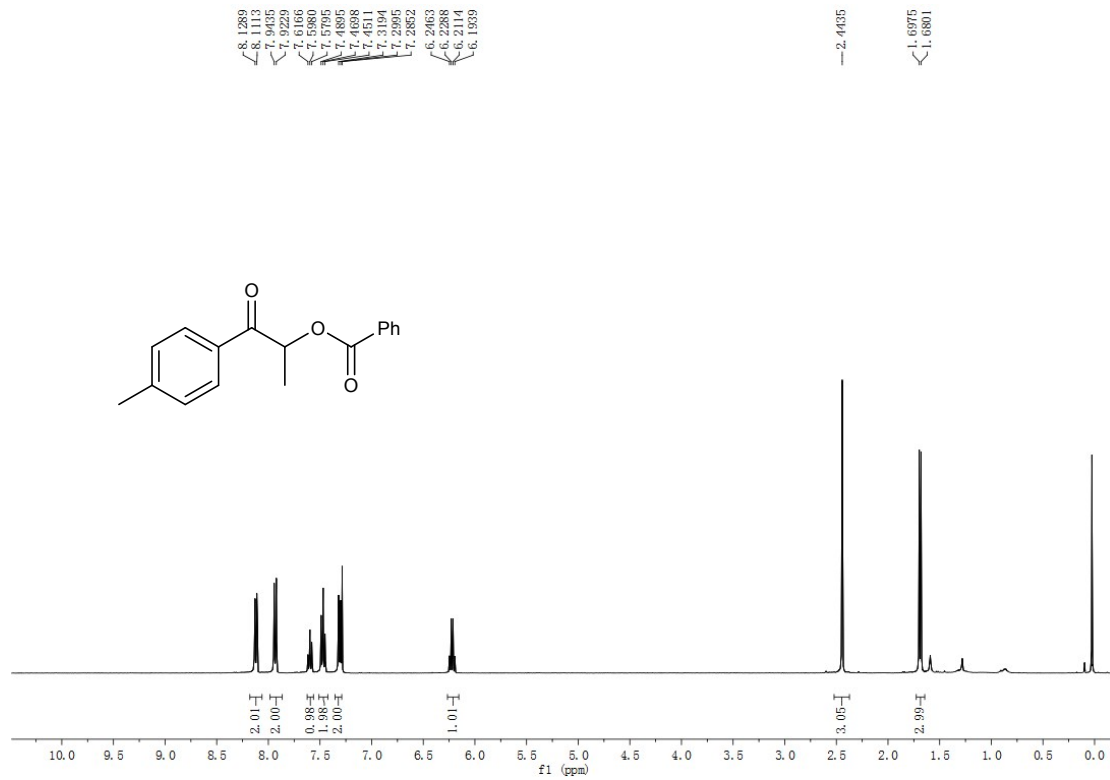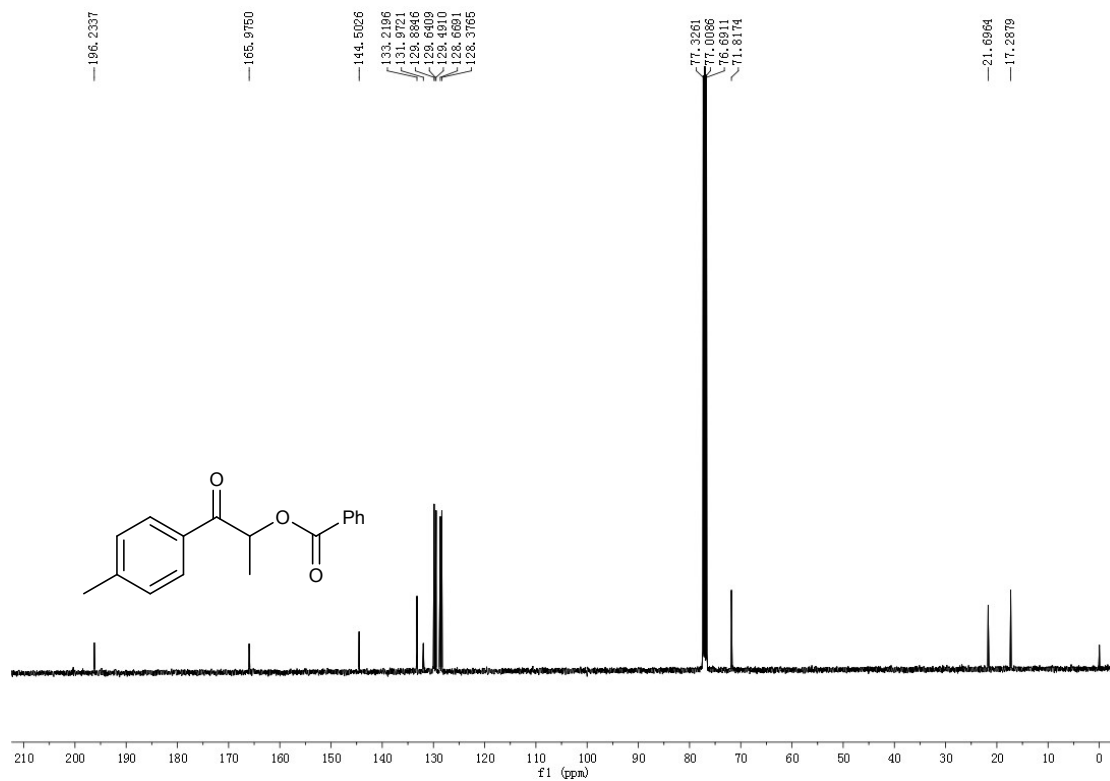



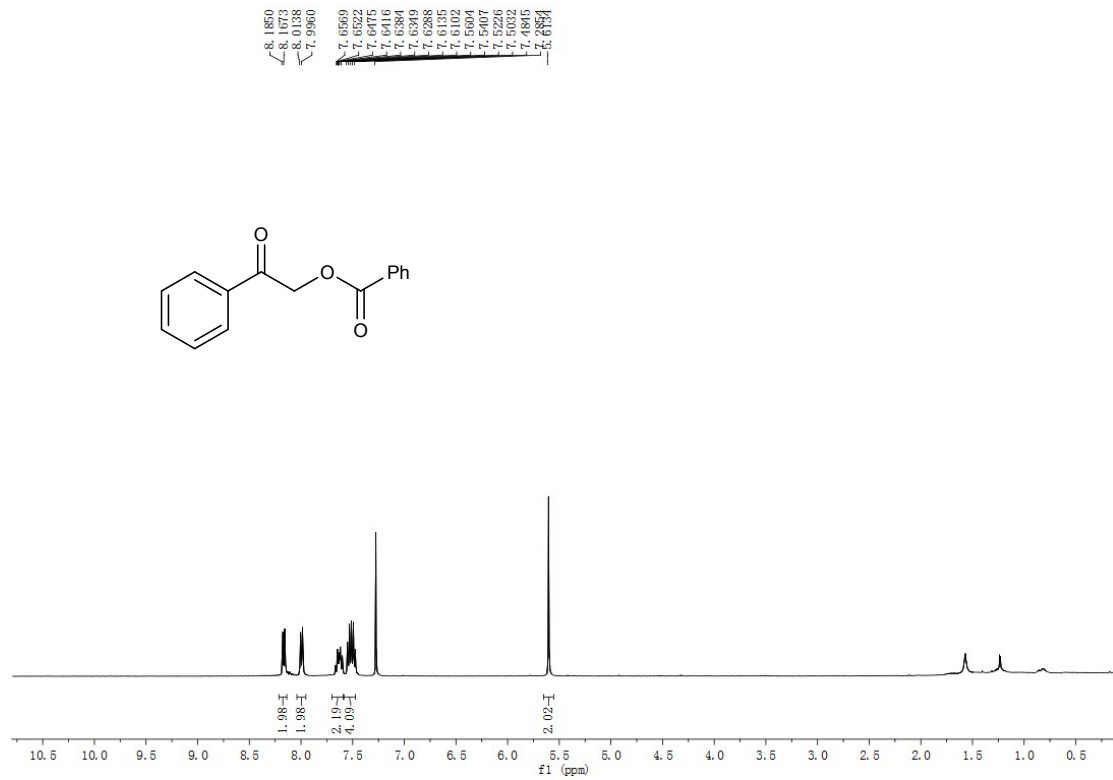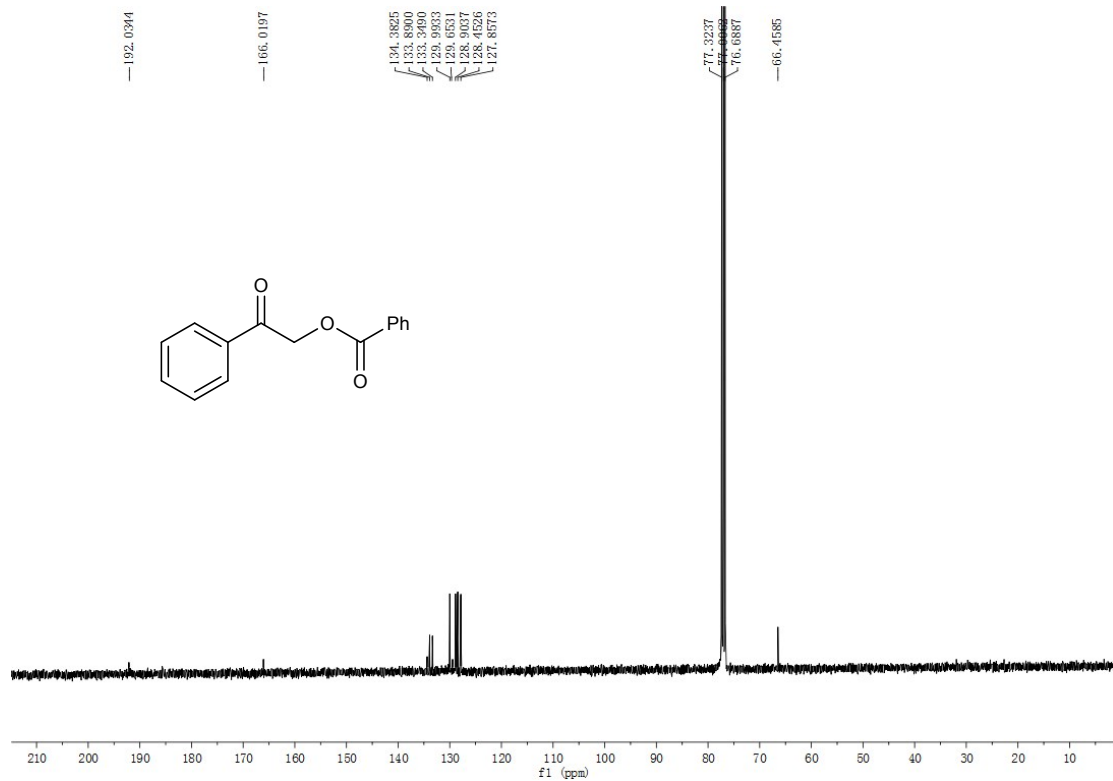

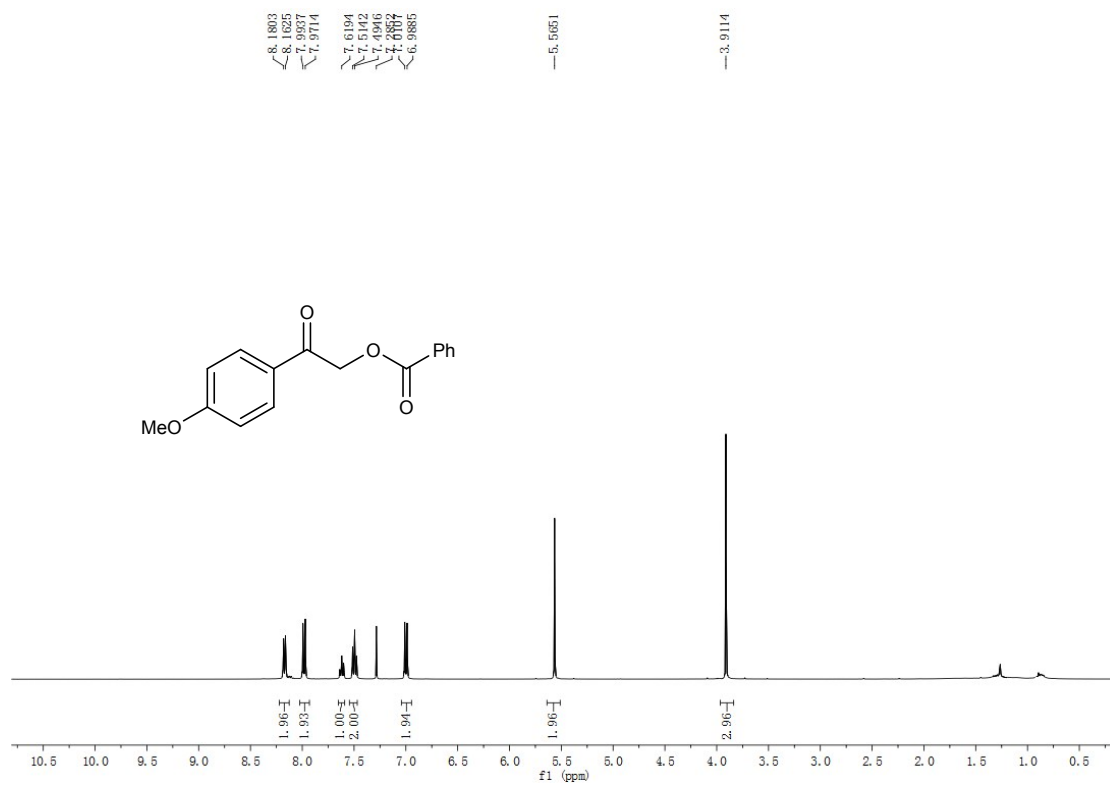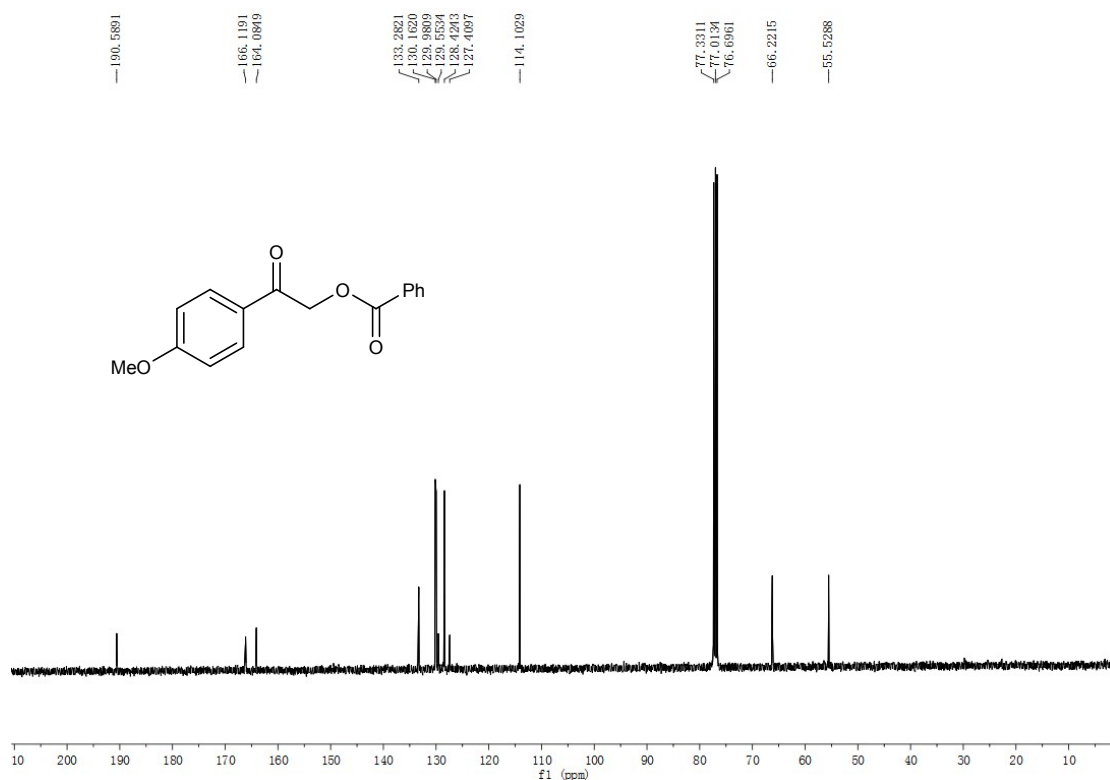

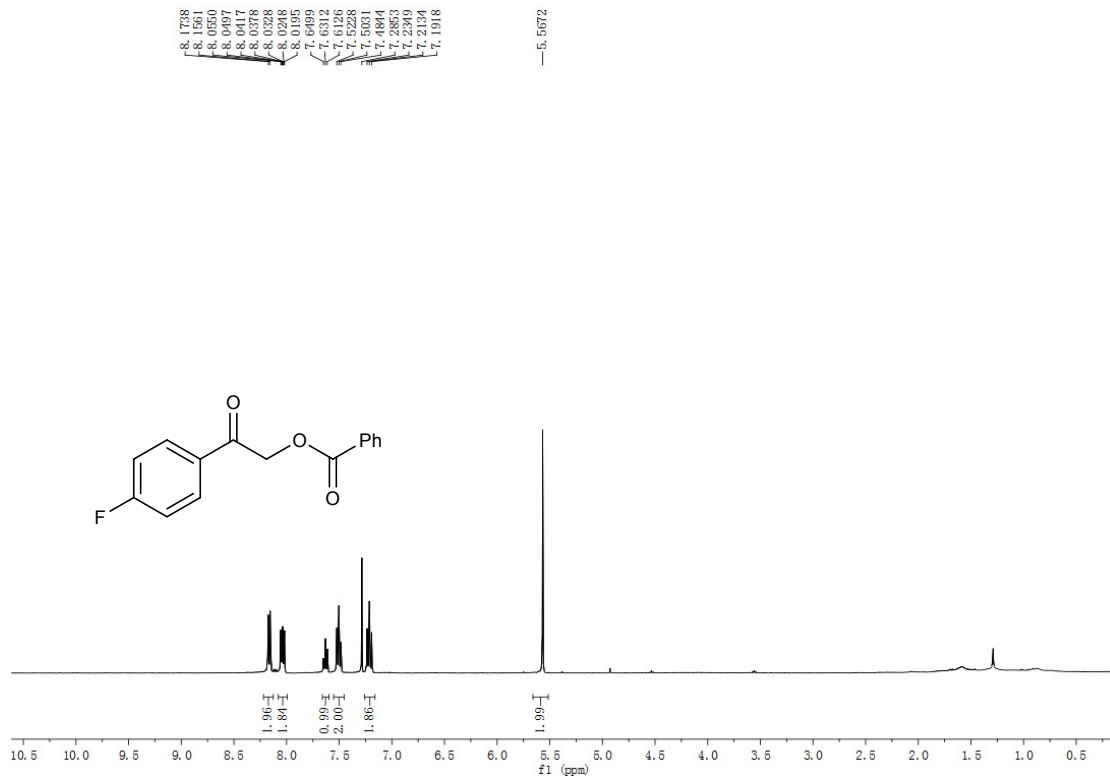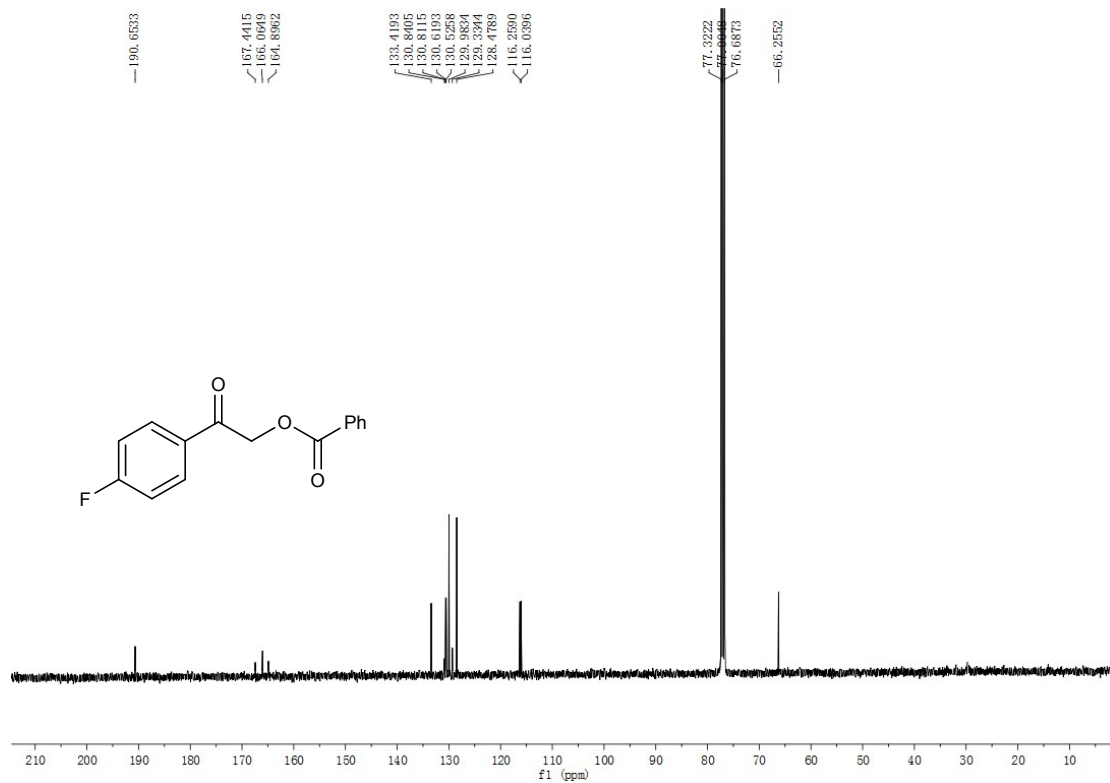

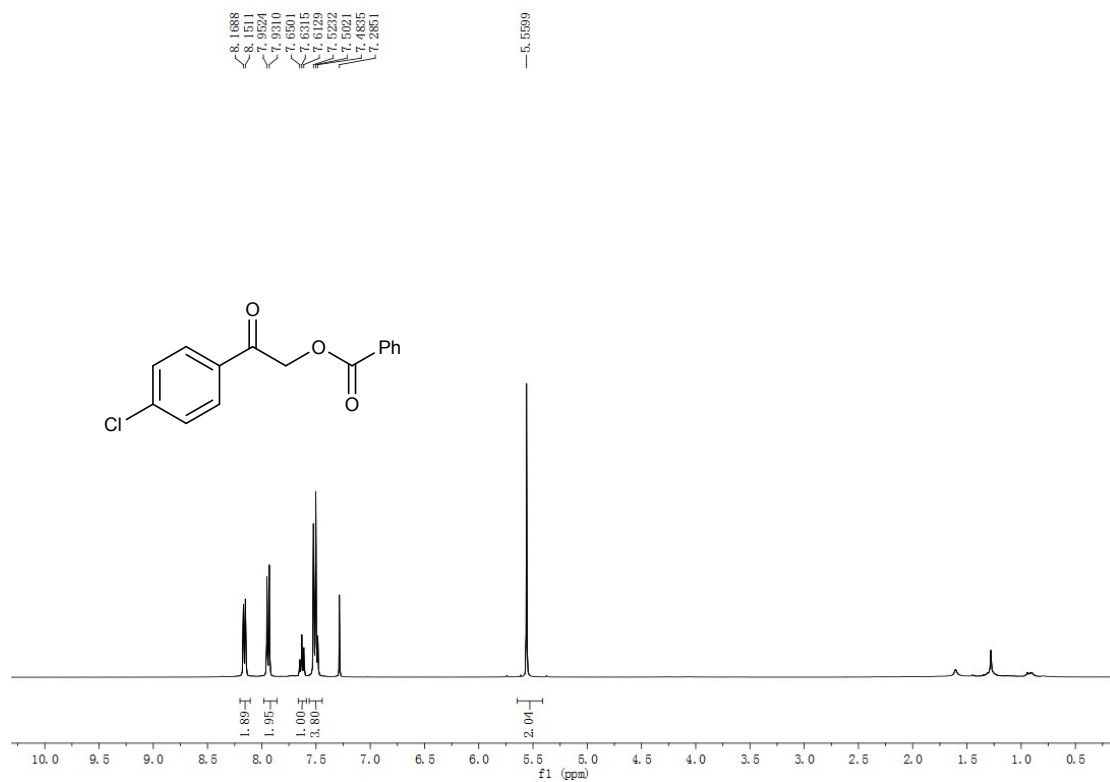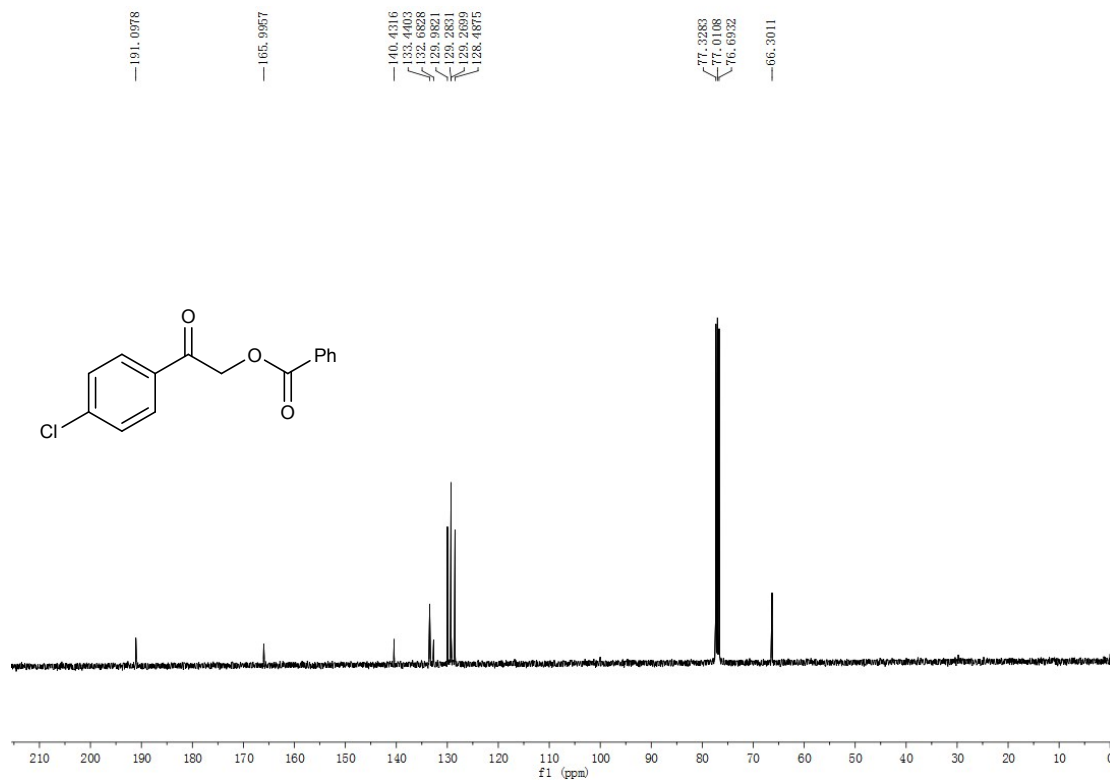

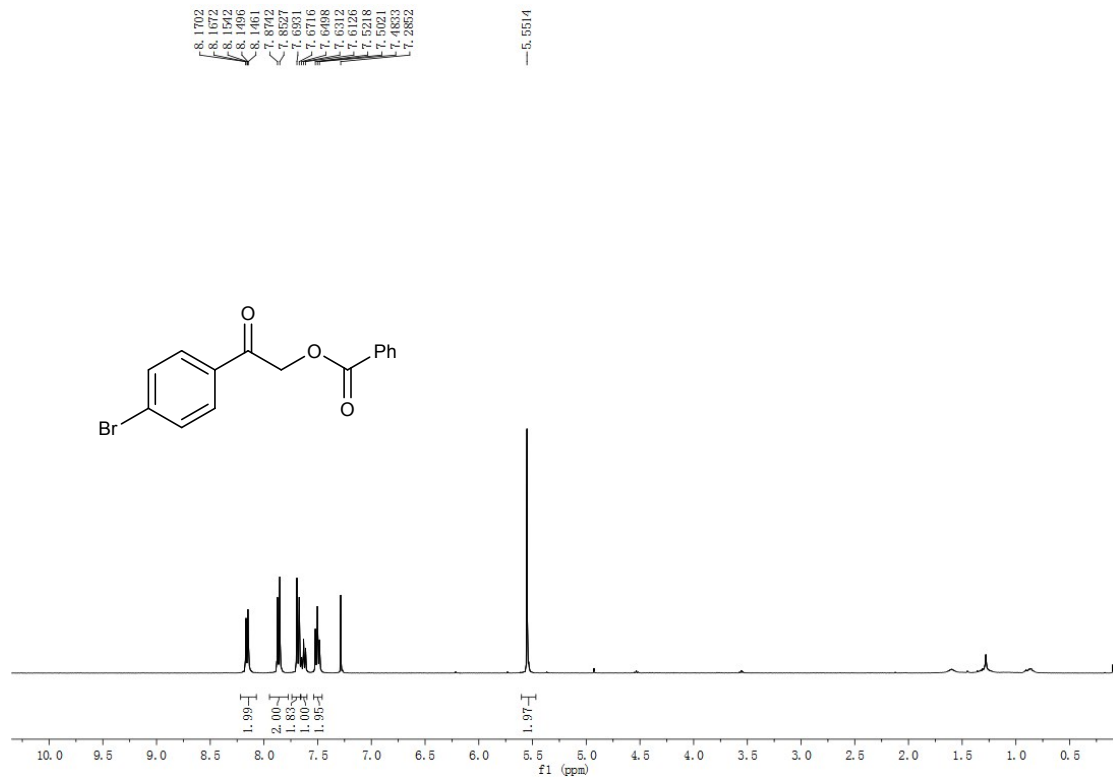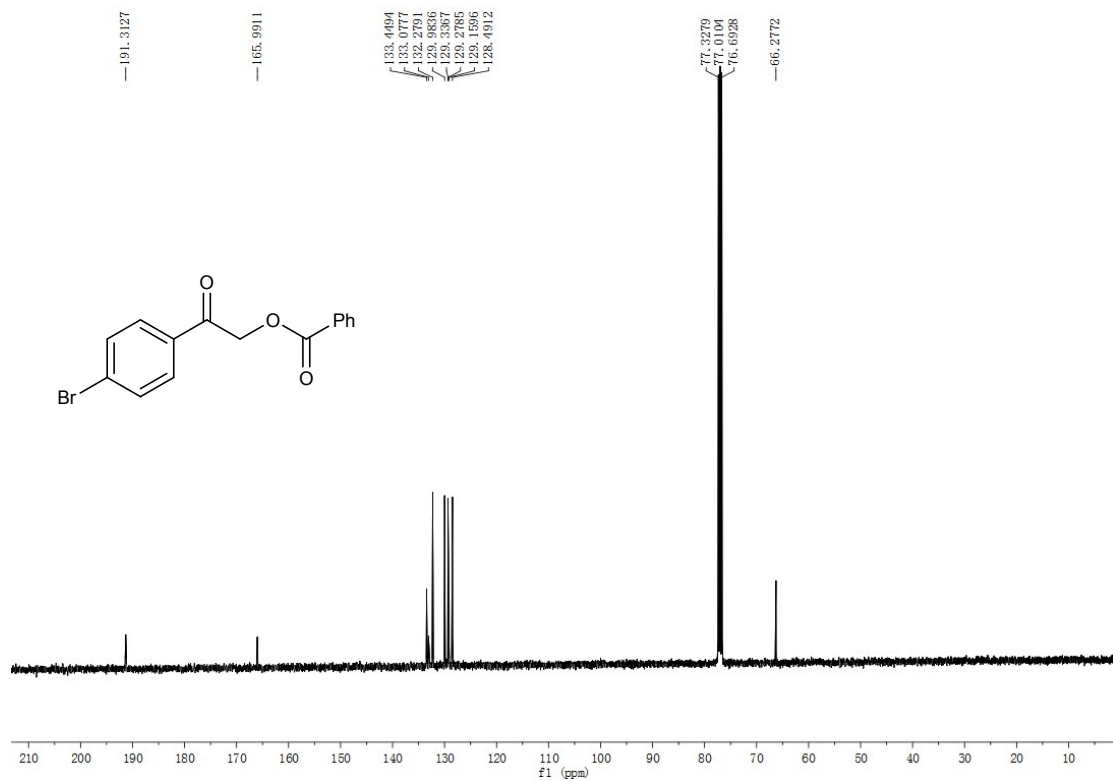



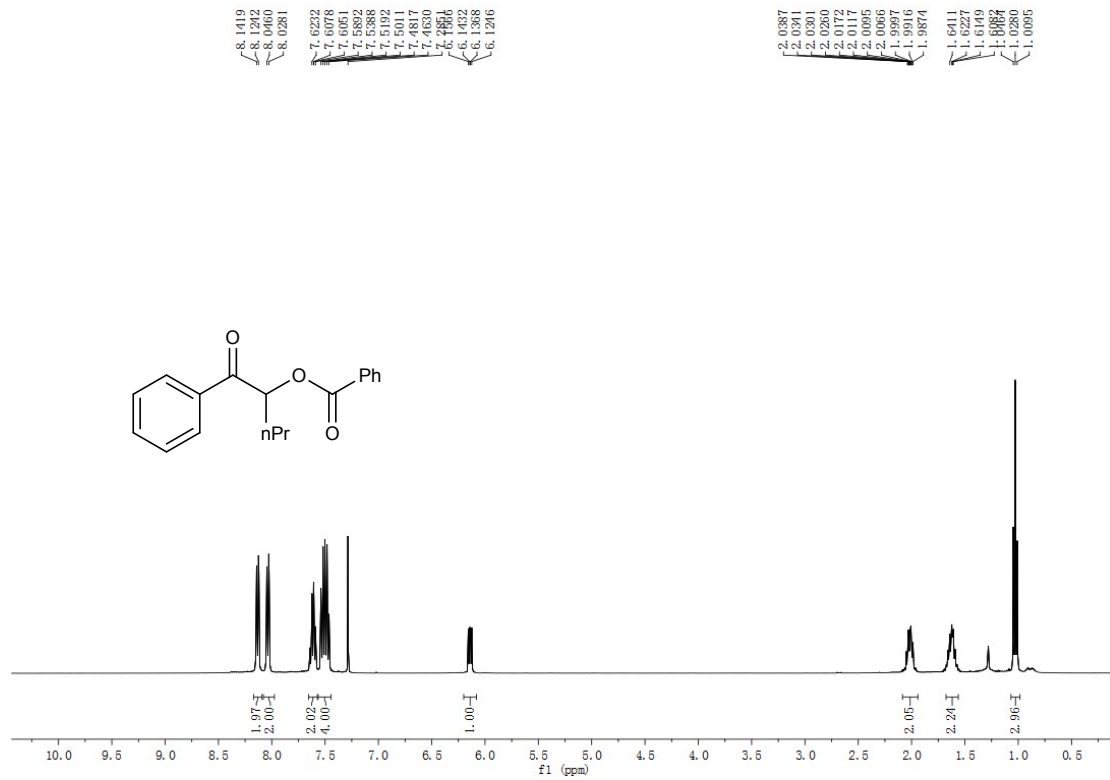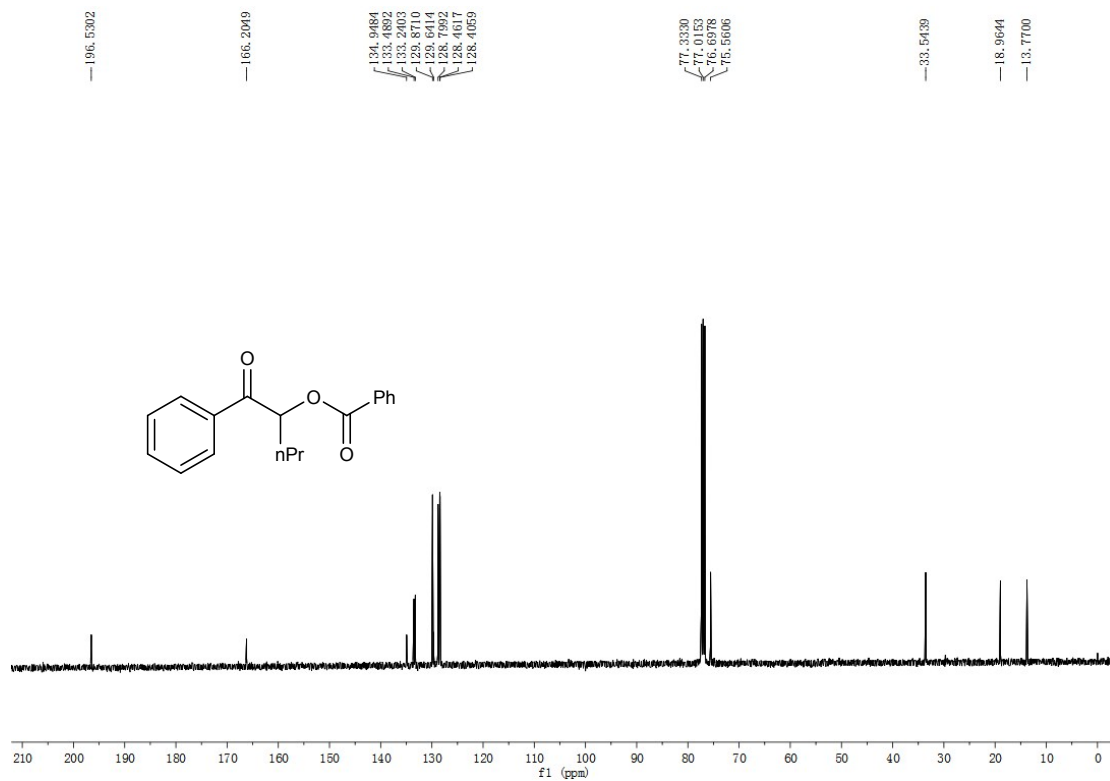

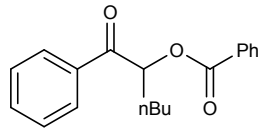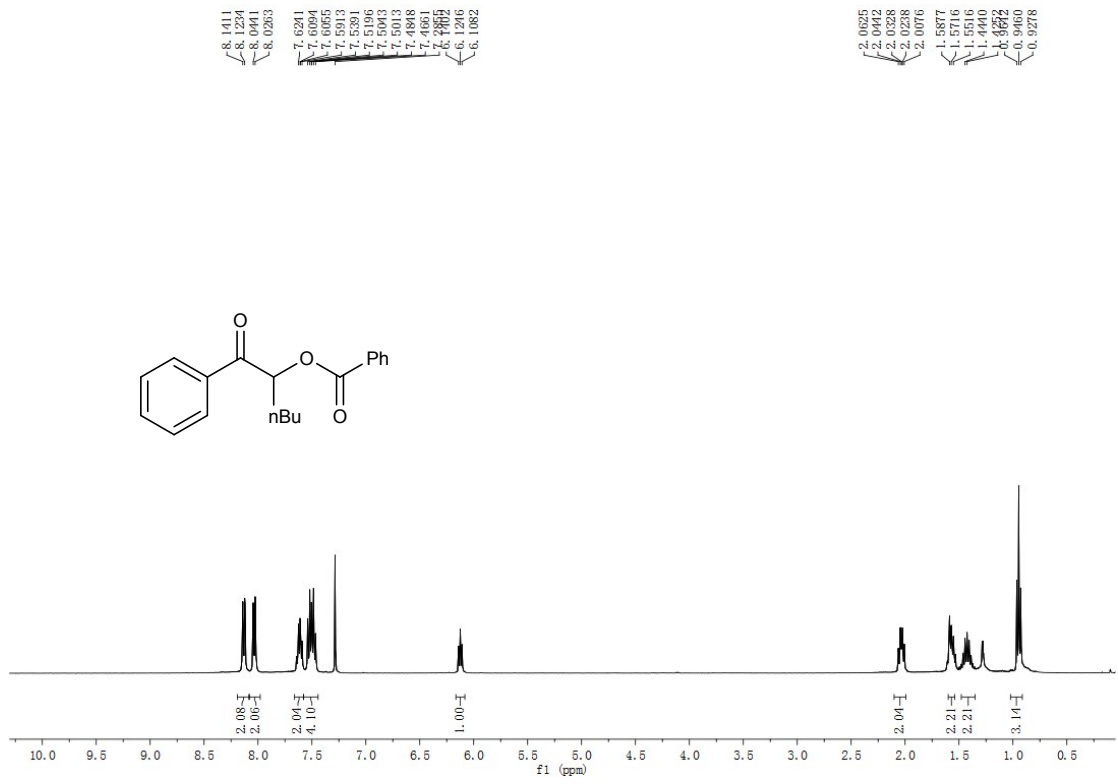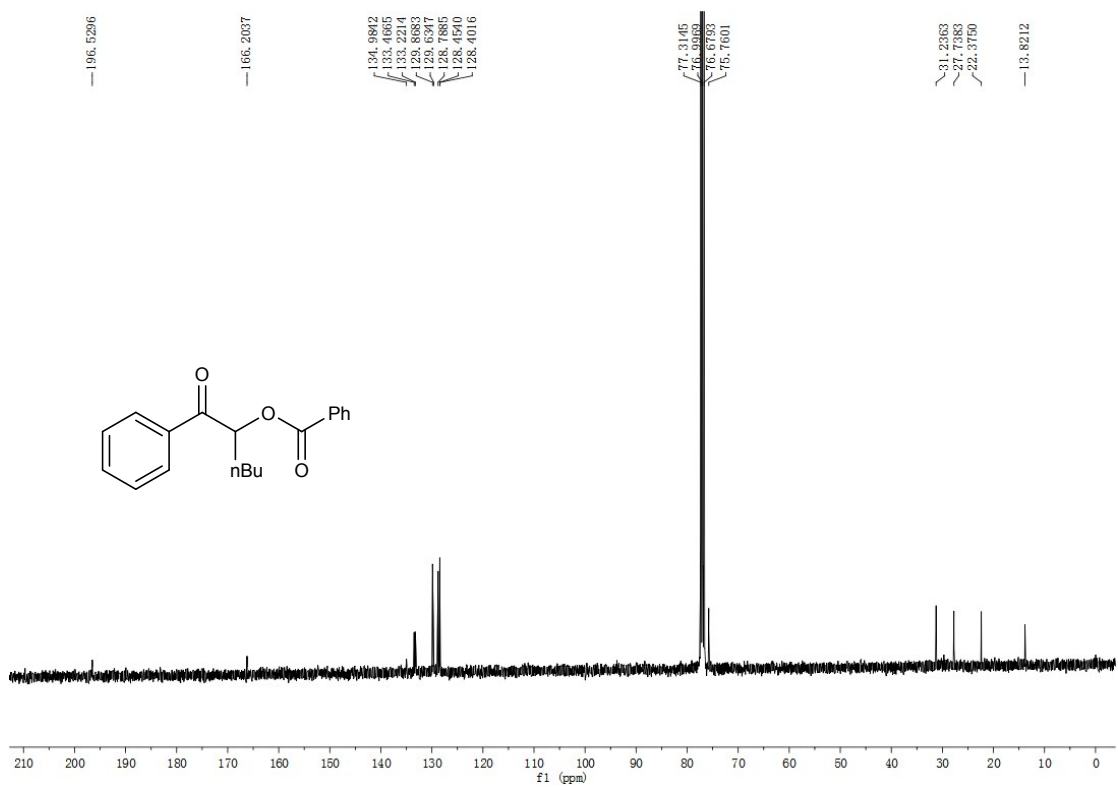



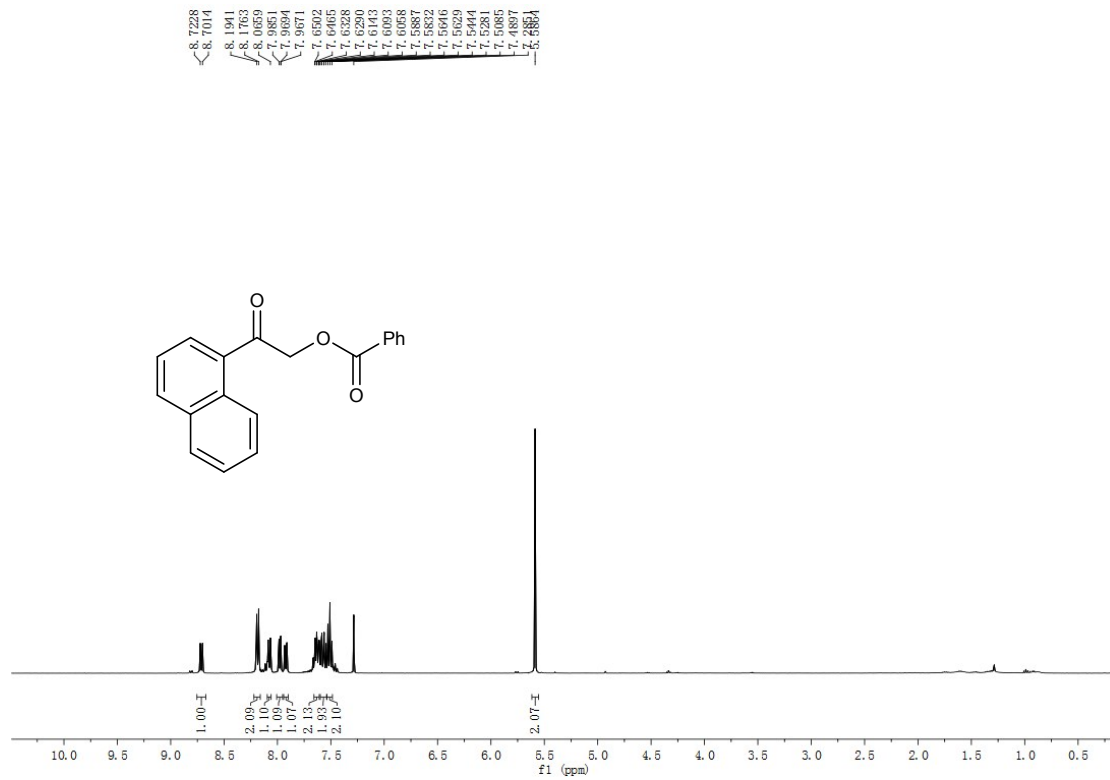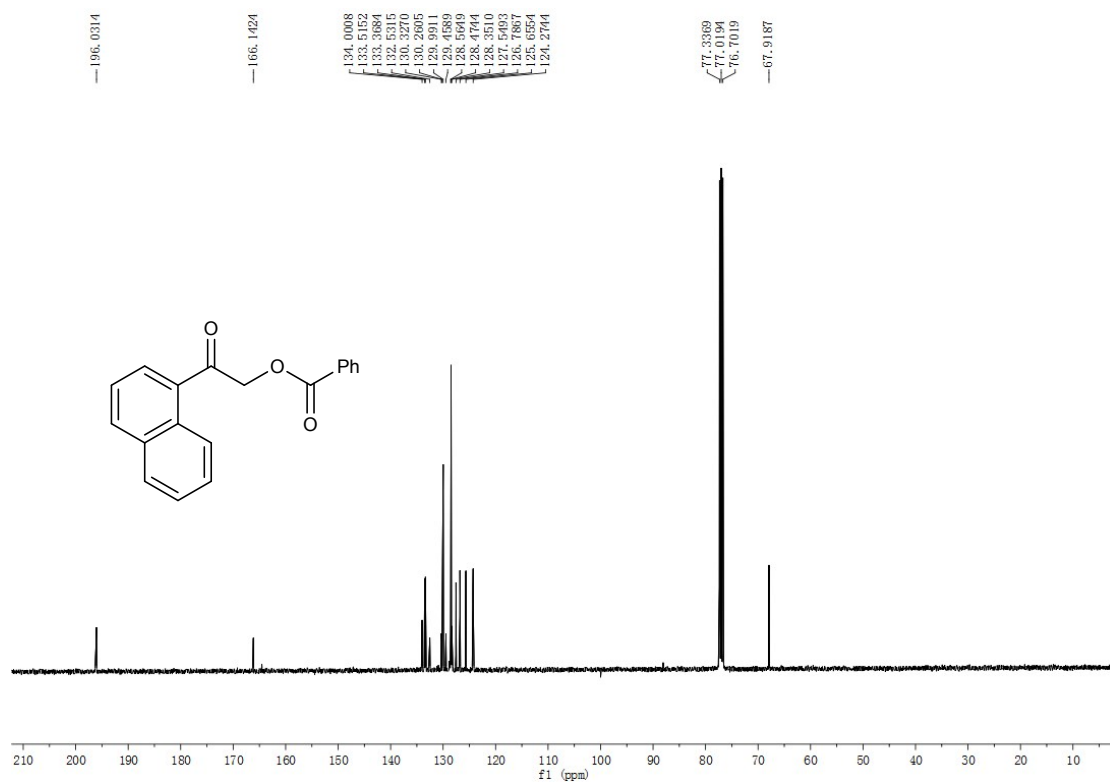

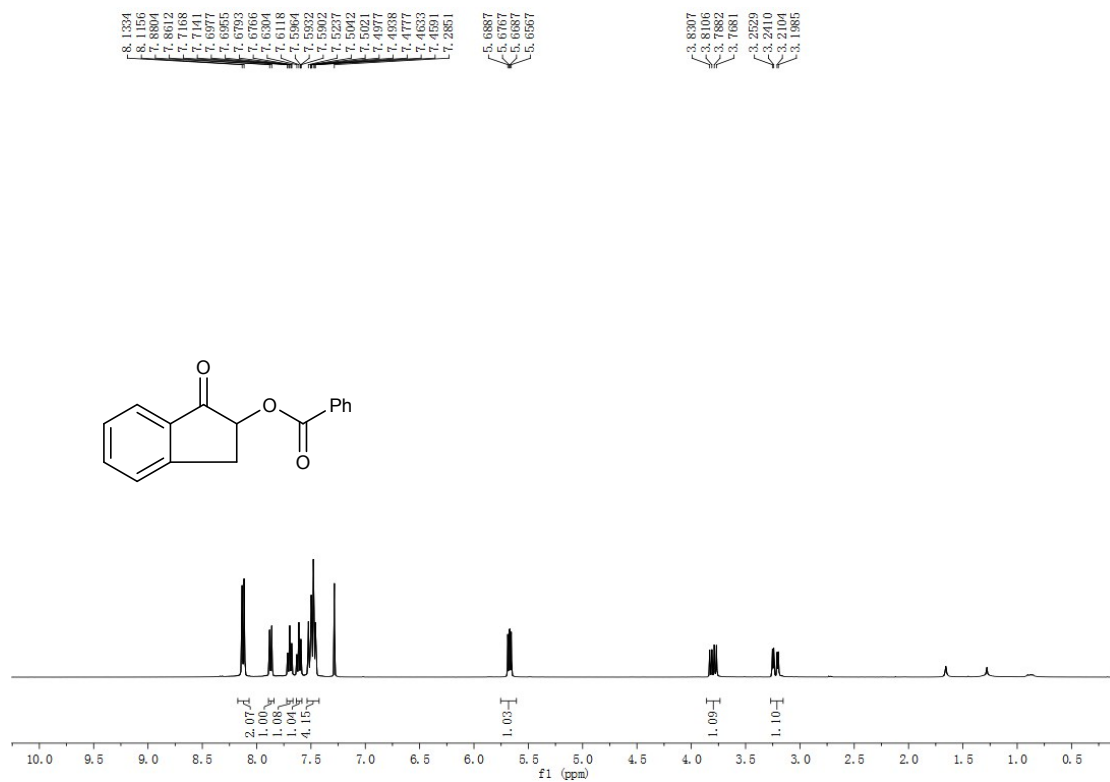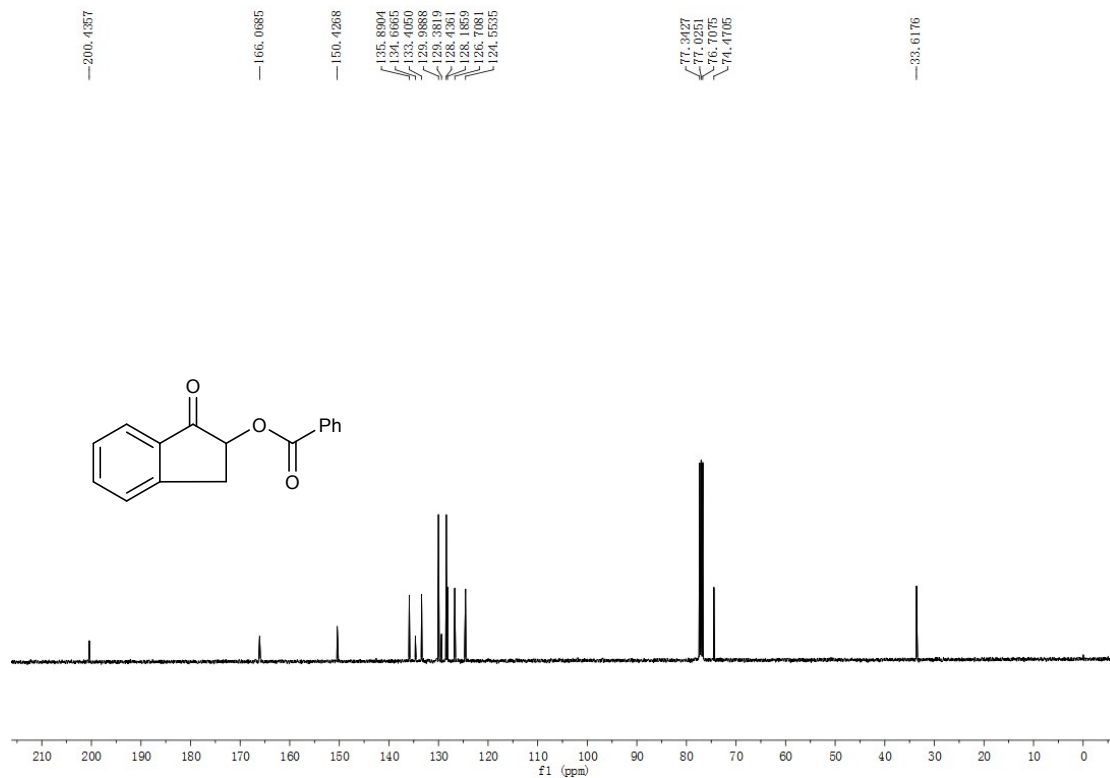

8.1866  
8.1837  
8.1708  
8.1600  
8.1625  
8.1613  
8.0901  
8.0822  
8.0795  
7.6154  
7.5969  
7.5595  
7.5561  
7.5408  
7.5373  
7.5229  
7.4929  
7.4746  
7.3991  
7.3801  
7.3339  
7.3337  
7.8369  
5.8168  
5.8038

3.3612  
3.3496  
3.3298  
3.3185  
3.3069  
3.2957  
3.2757  
3.2072  
3.1963  
3.1882  
3.1616  
3.1539  
3.1455  
2.6583  
2.5916  
2.5837  
2.5791  
2.5725  
2.5651  
2.5603  
2.5574  
2.5476  
2.5403  
2.5219  
2.5102  
2.4905  
2.4788  
2.4600  
2.4391  
2.4146

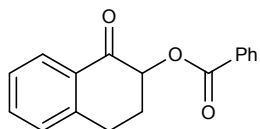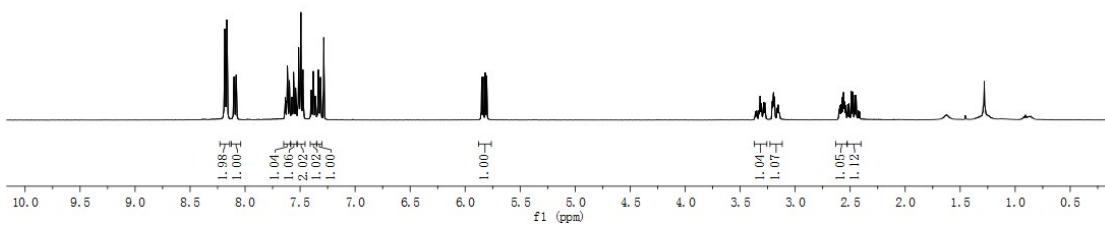

192.8166

165.8362

143.1010  
133.9259  
133.1859  
131.7115  
129.9875  
128.8477  
128.6700  
128.3773  
127.9381  
127.0270

77.0213  
77.0209  
76.6804  
75.0383

29.3353  
27.9994

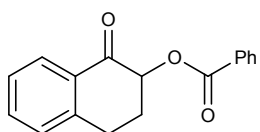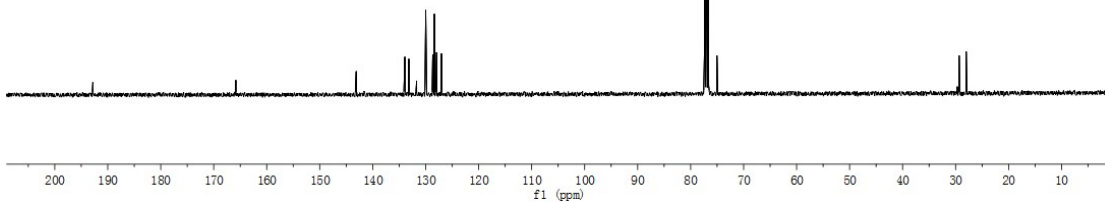

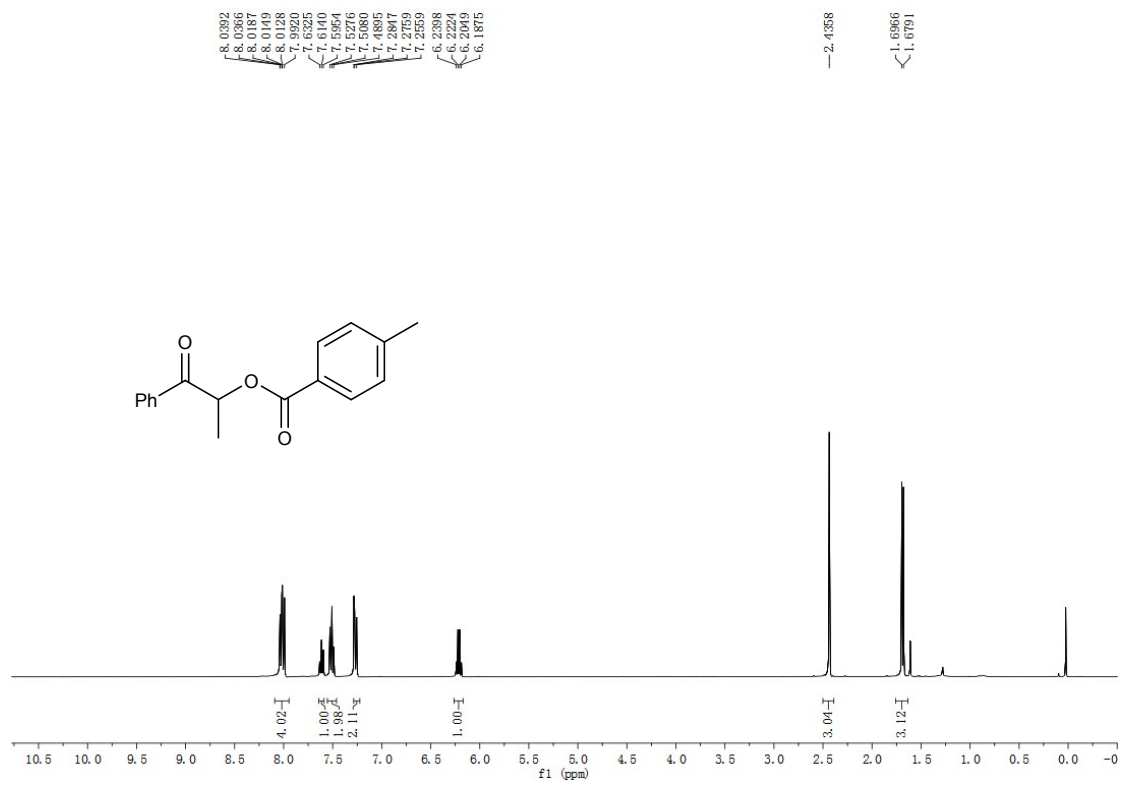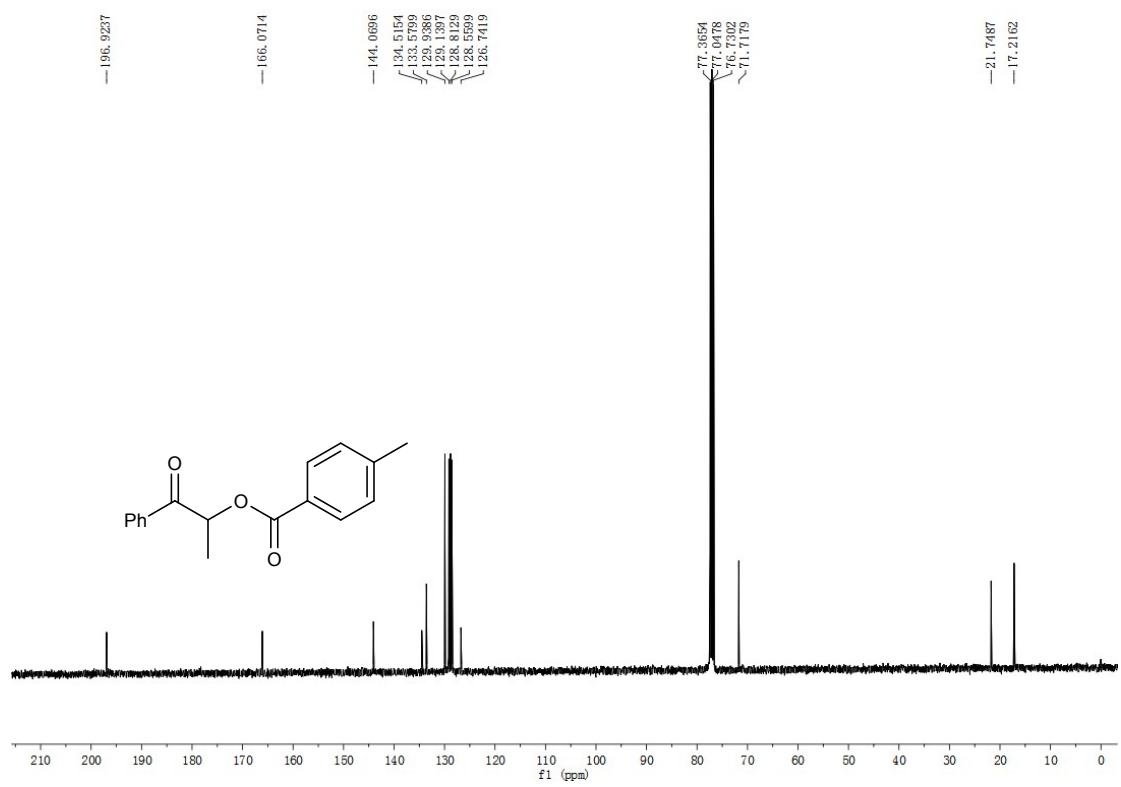

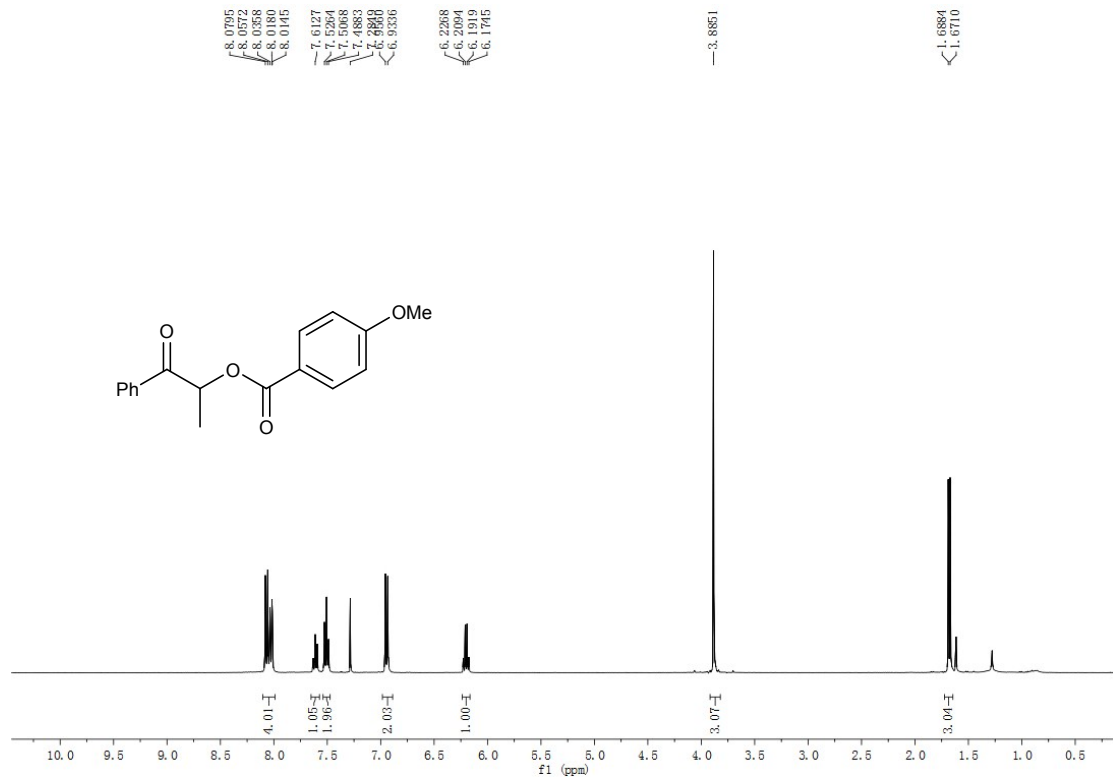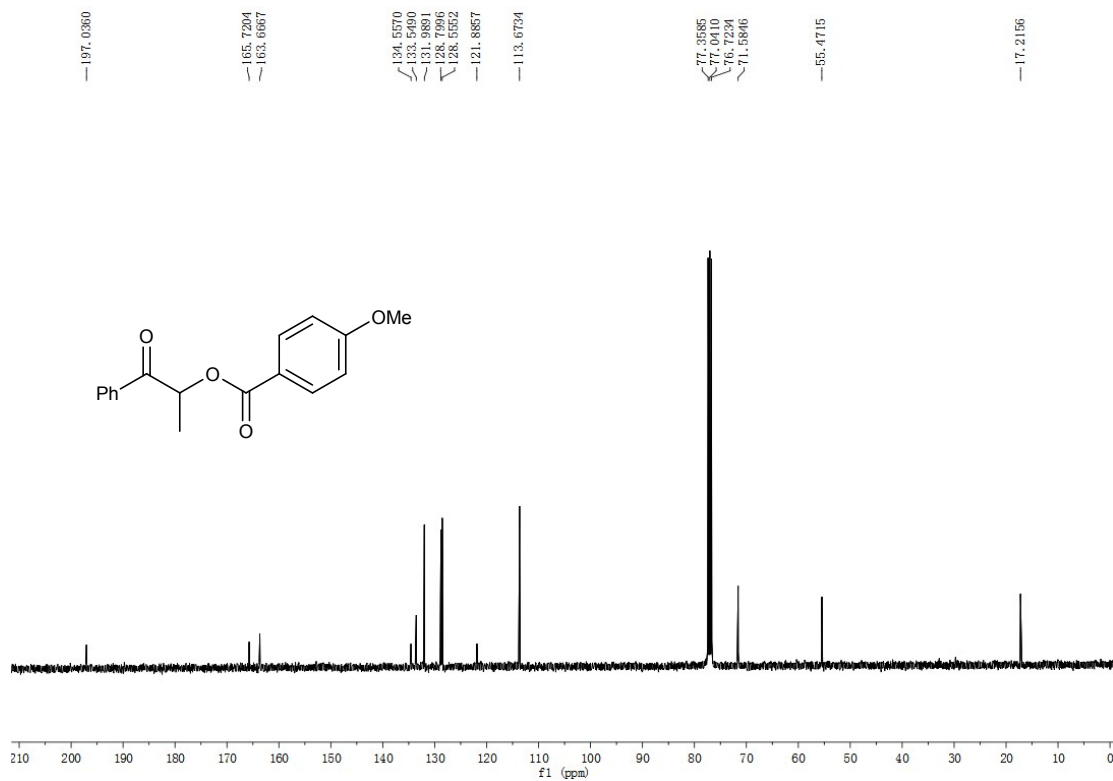

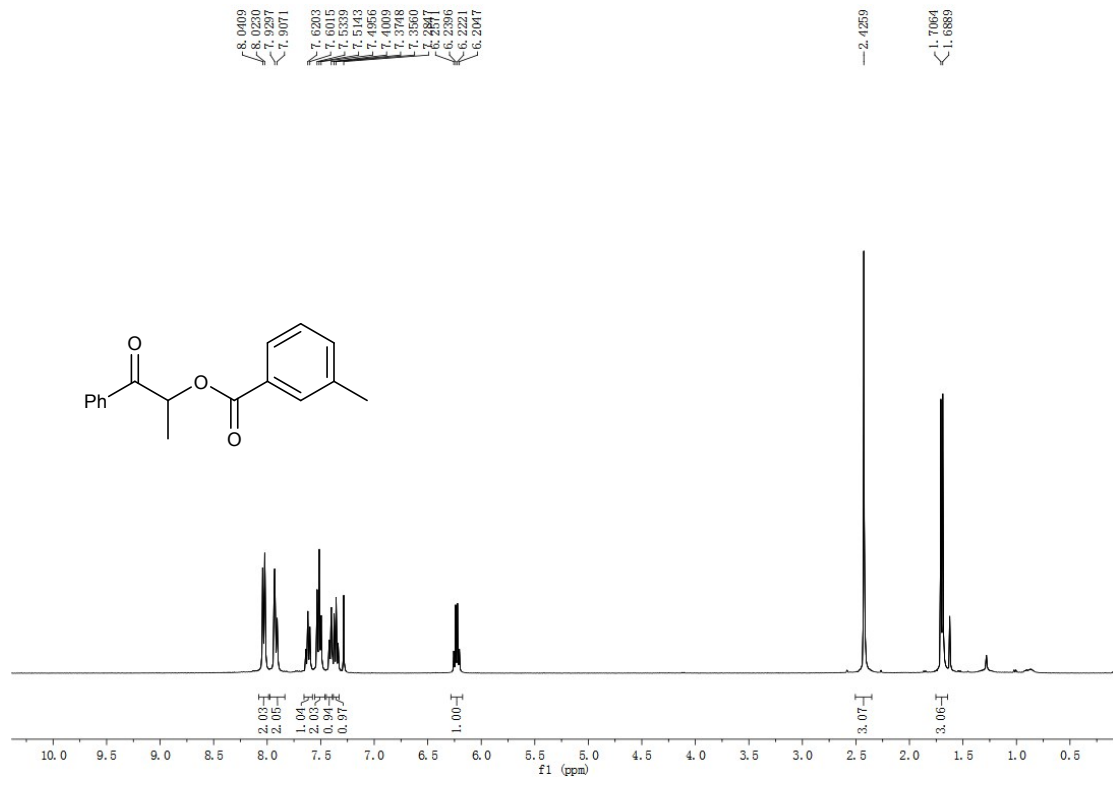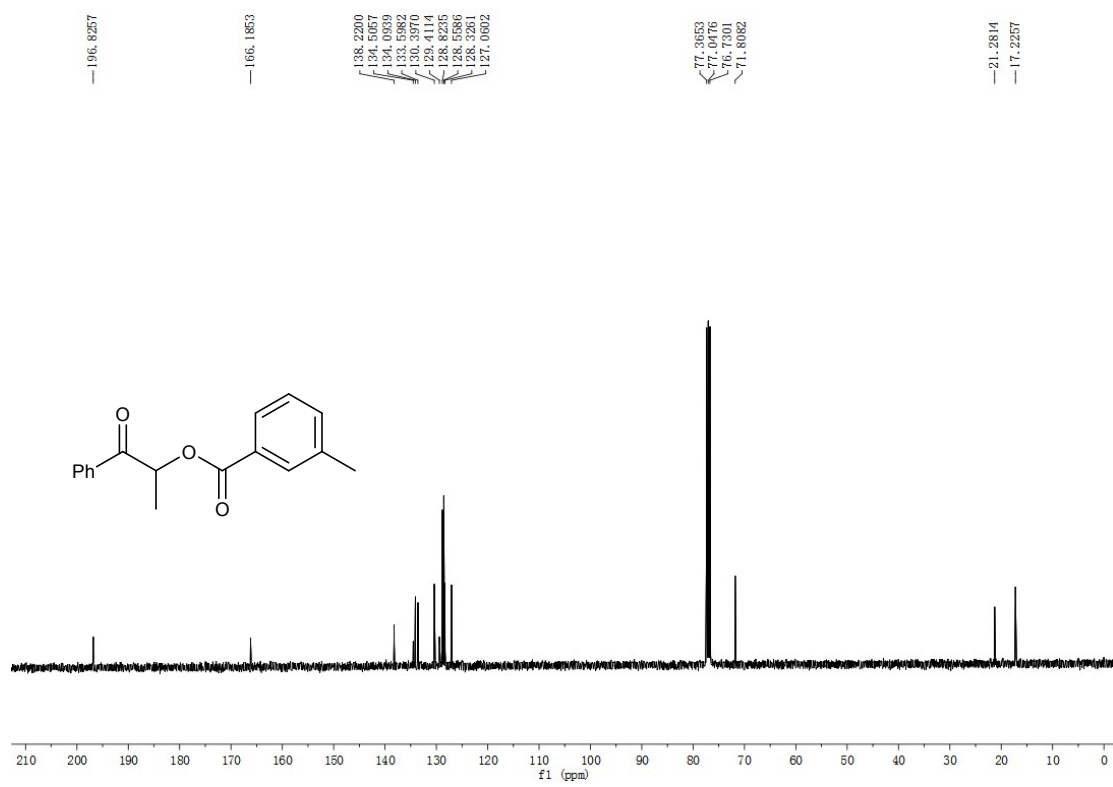

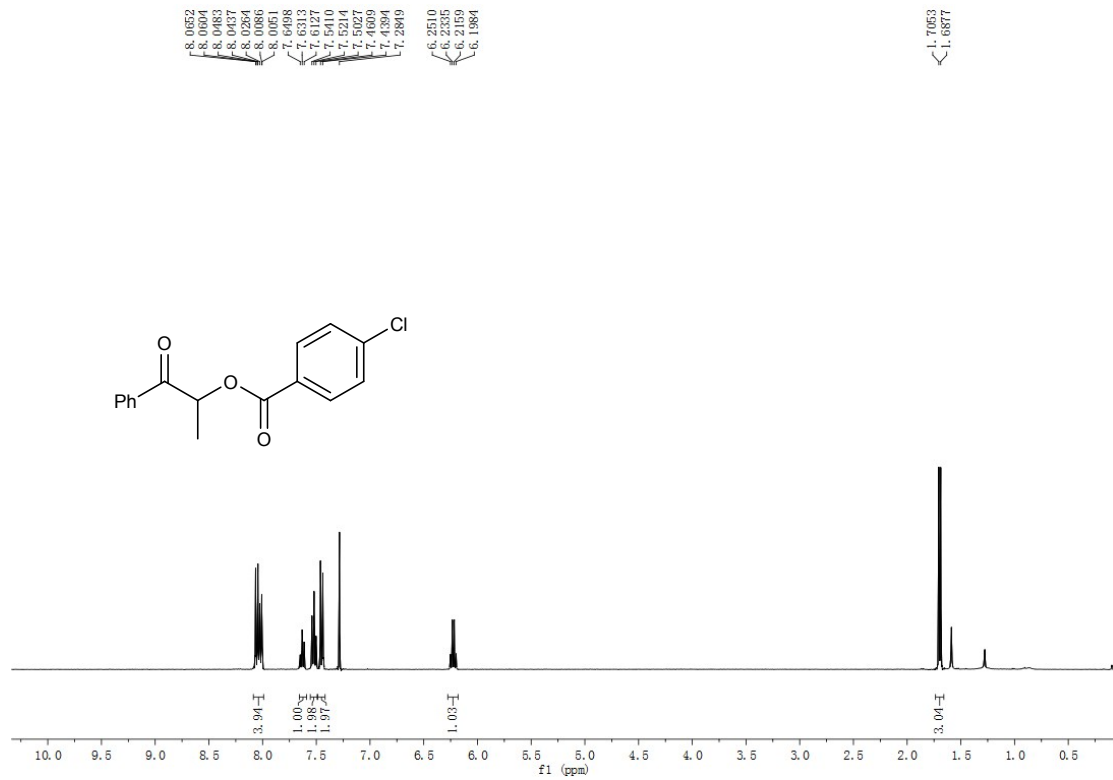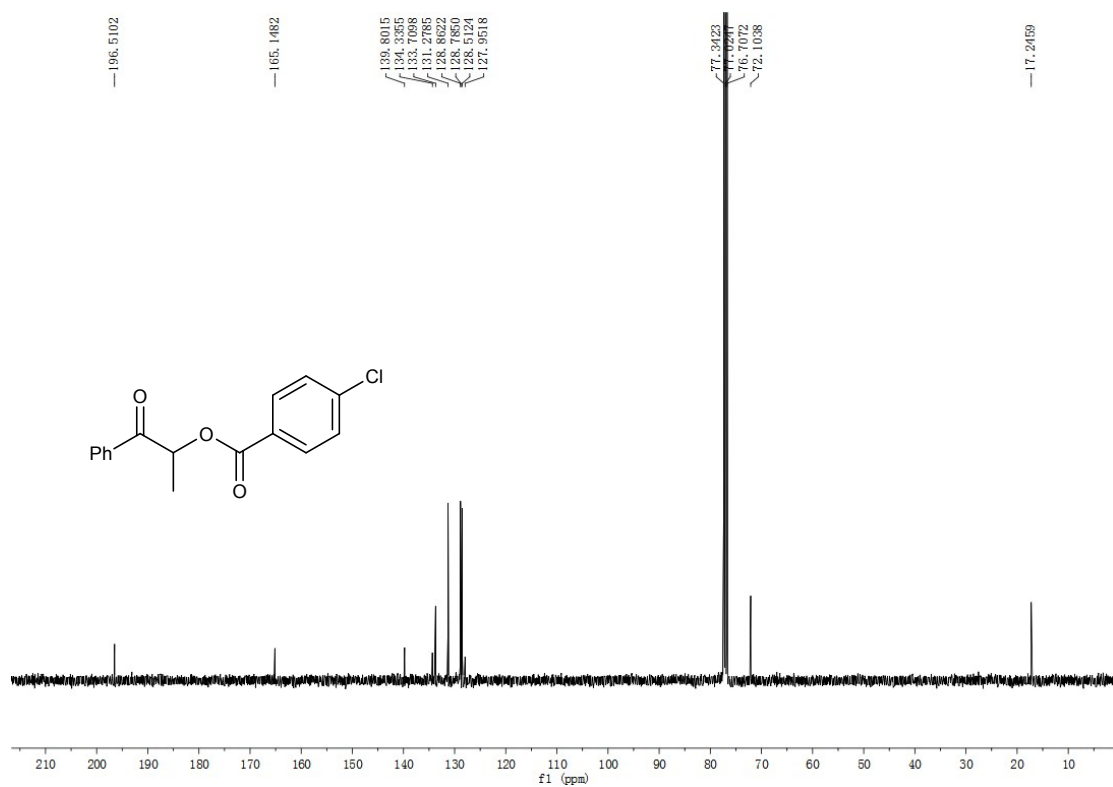

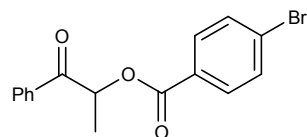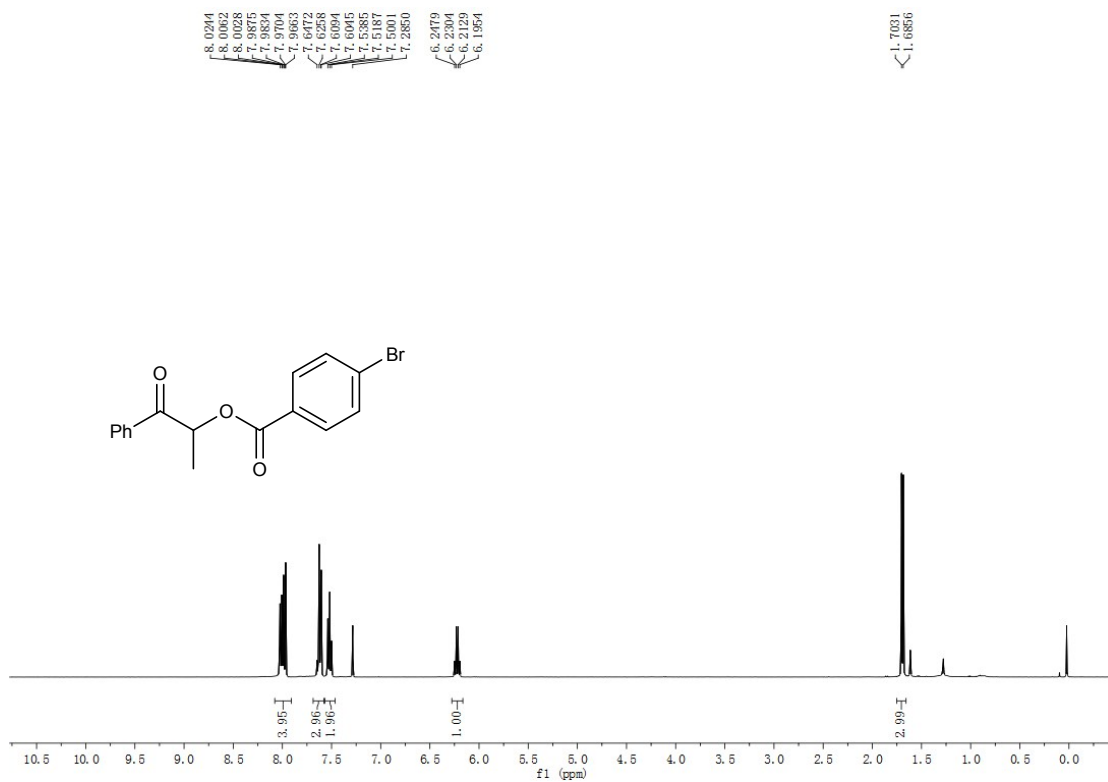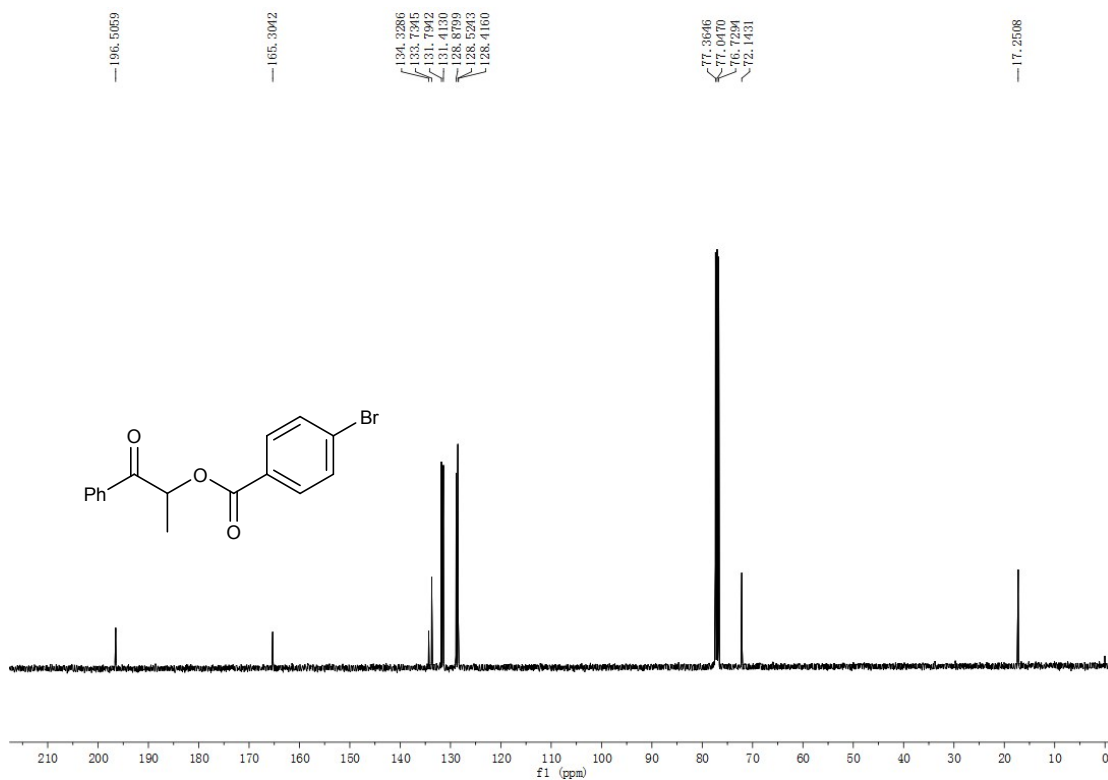



8.3456  
8.3288  
8.3229  
8.3084  
8.3024  
8.2913  
8.2856  
7.6712  
7.6556  
7.6370  
7.6222  
7.5725  
7.5239  
7.2850  
6.3059  
6.2883  
6.2708  
6.2532

1.7458  
1.7282

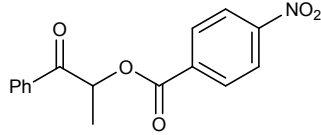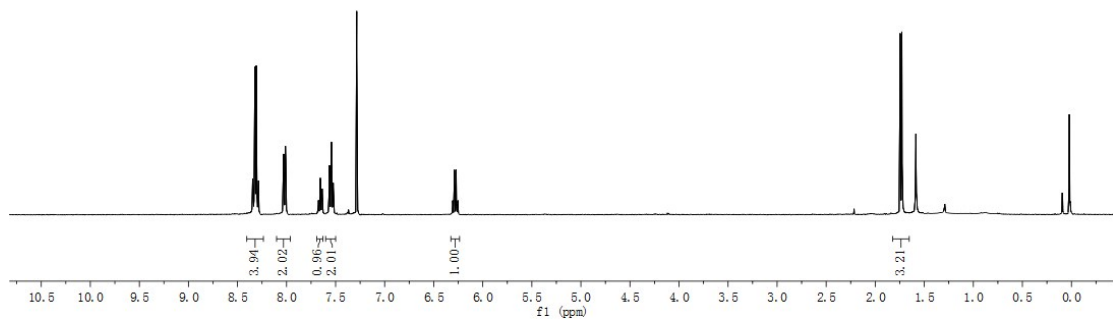

196.9885  
164.1604  
150.7571  
134.9383  
134.1506  
133.9056  
131.0286  
128.8883  
128.5711  
123.5826  
77.3387  
77.0214  
76.7036  
72.8005  
17.3022

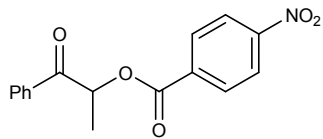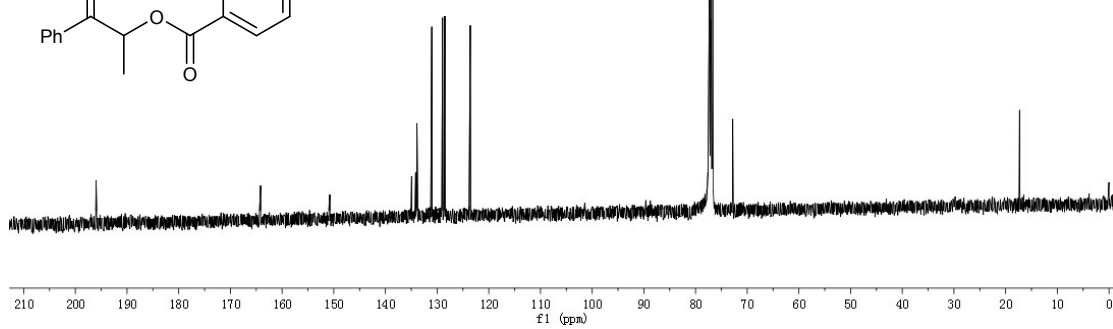

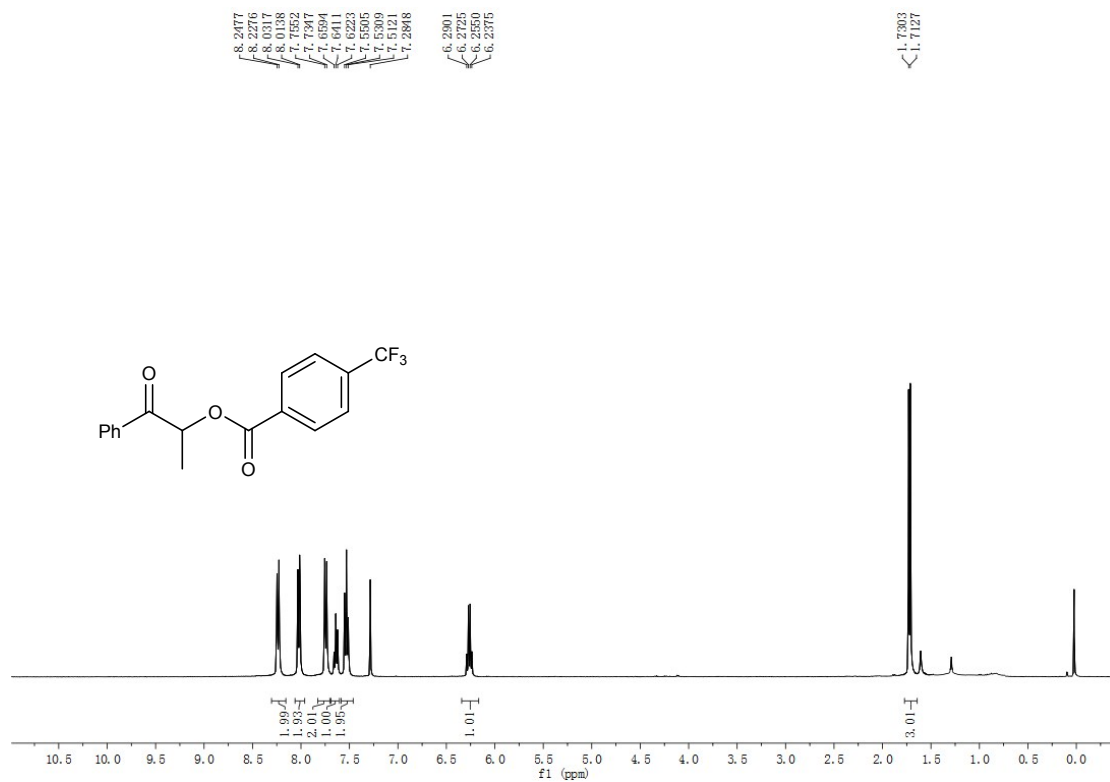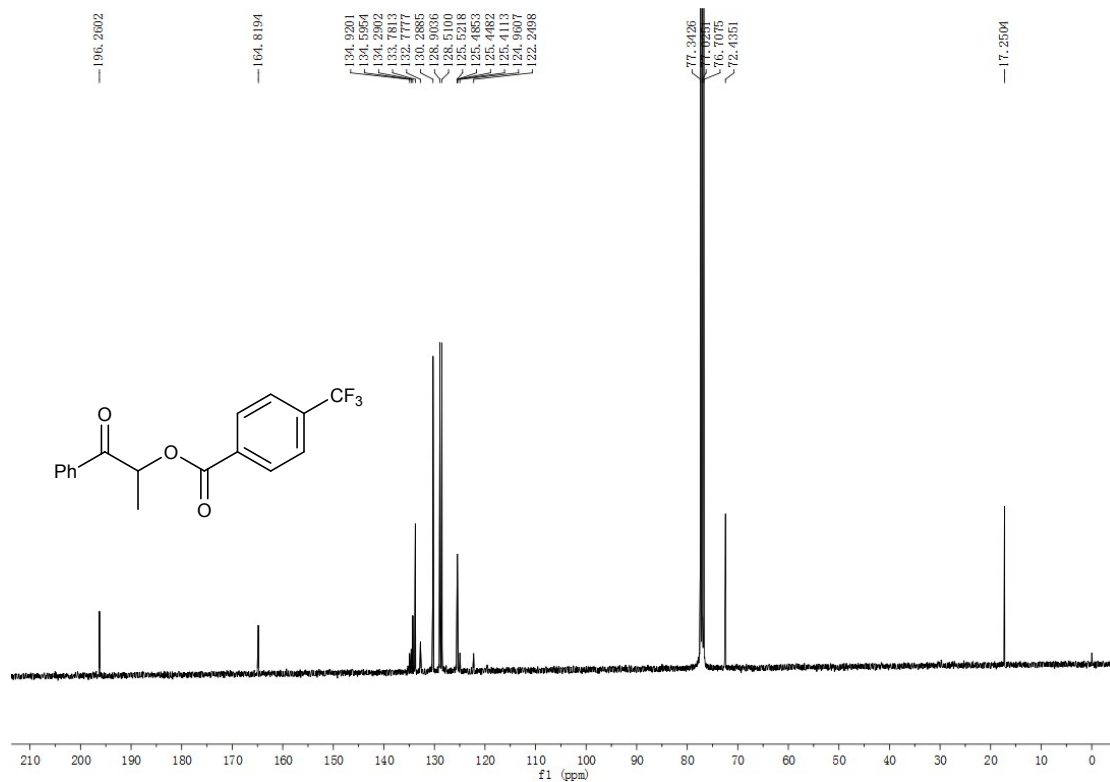

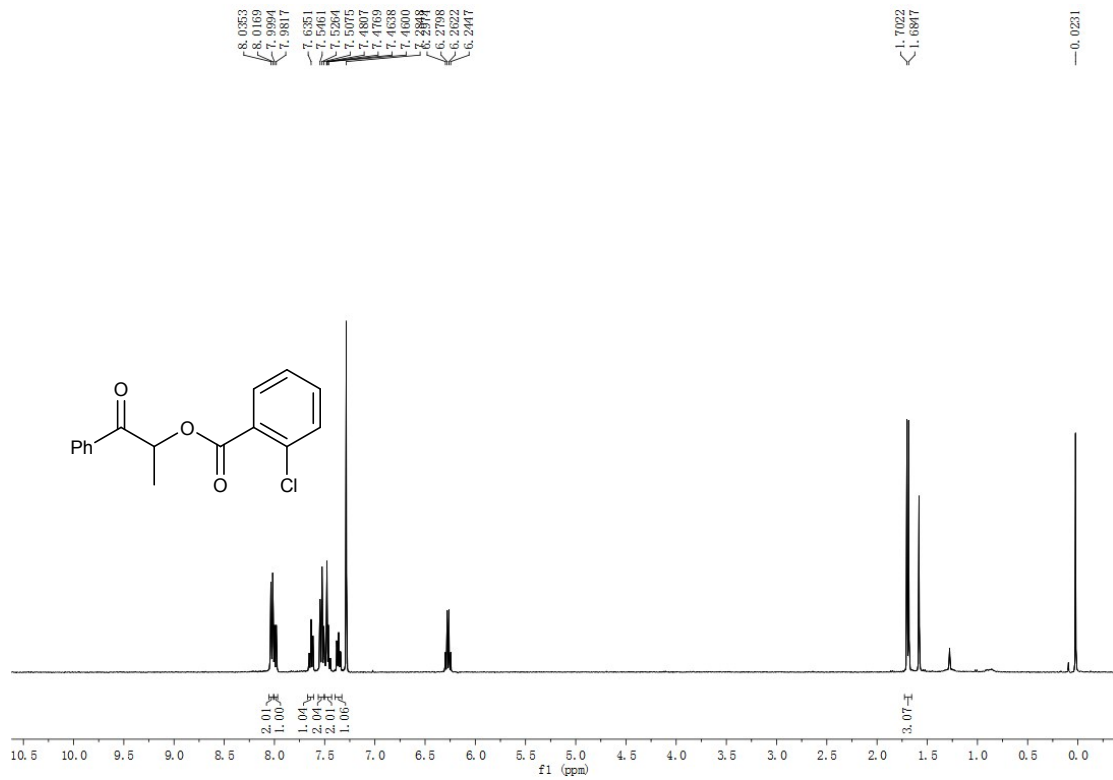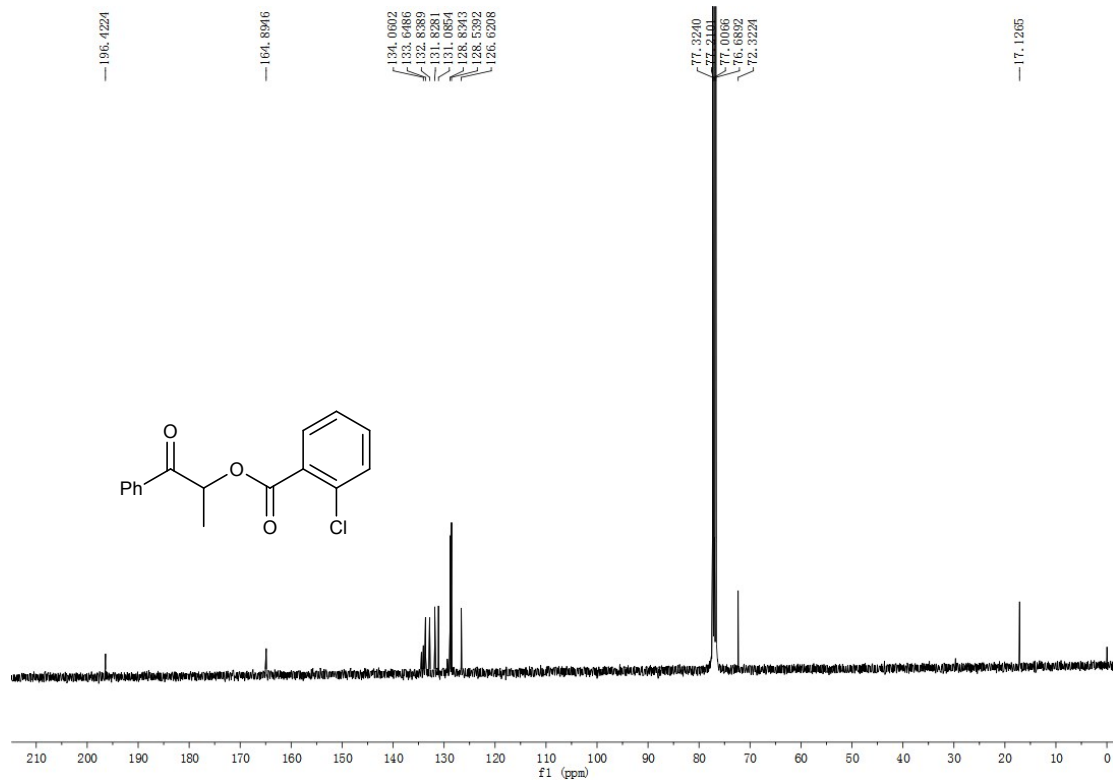

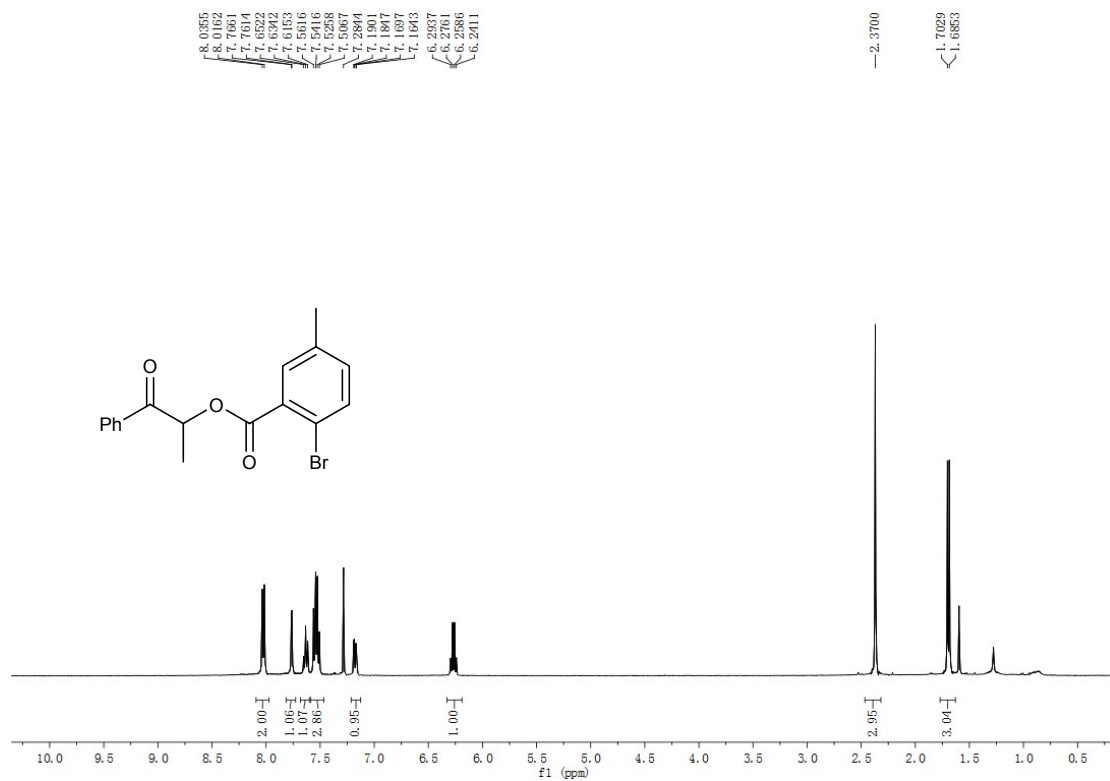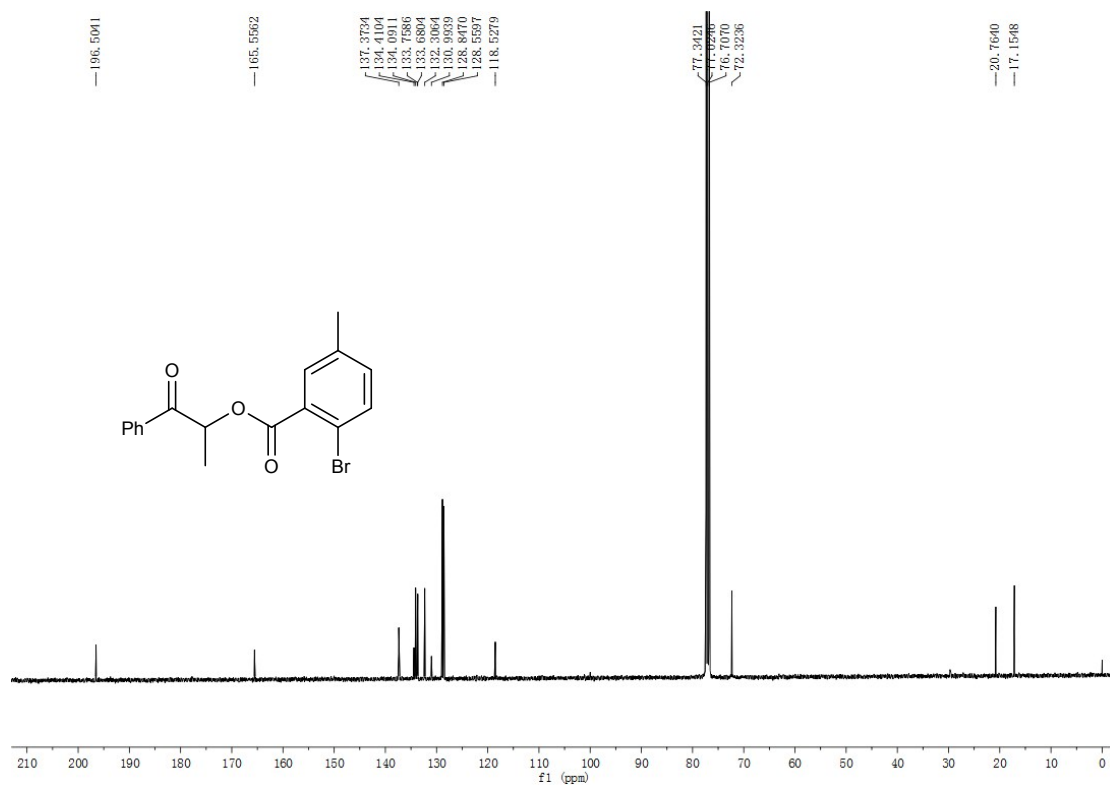

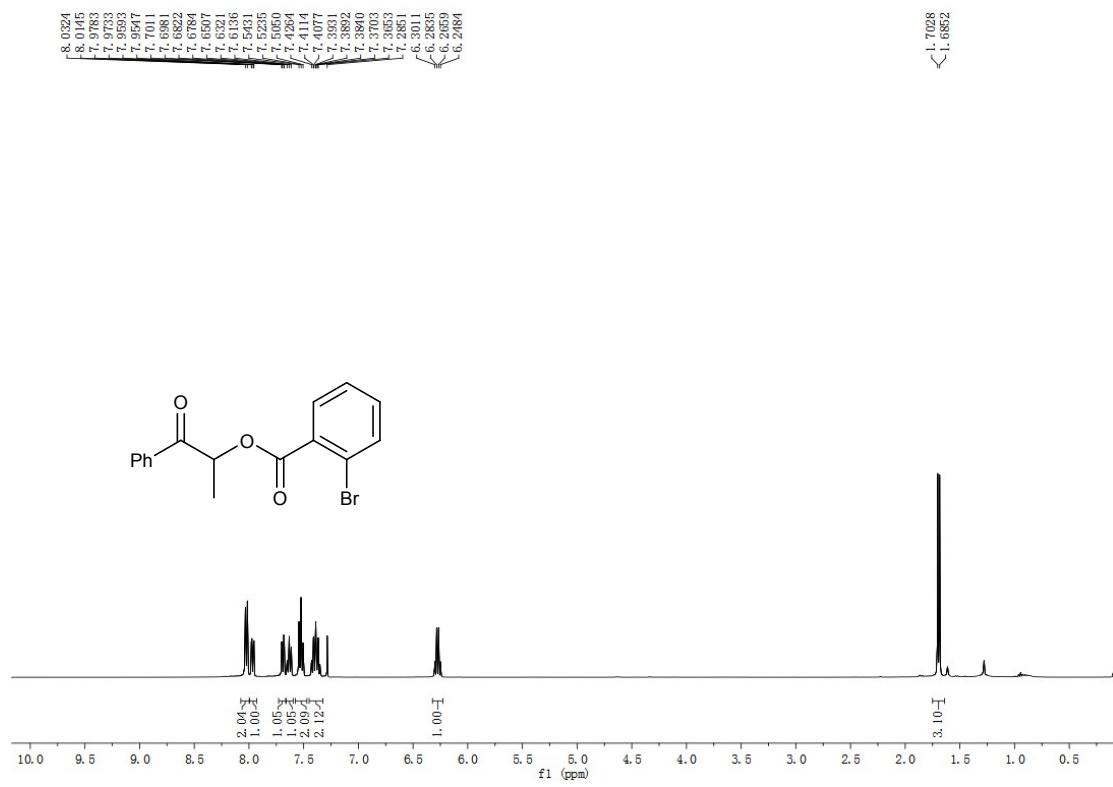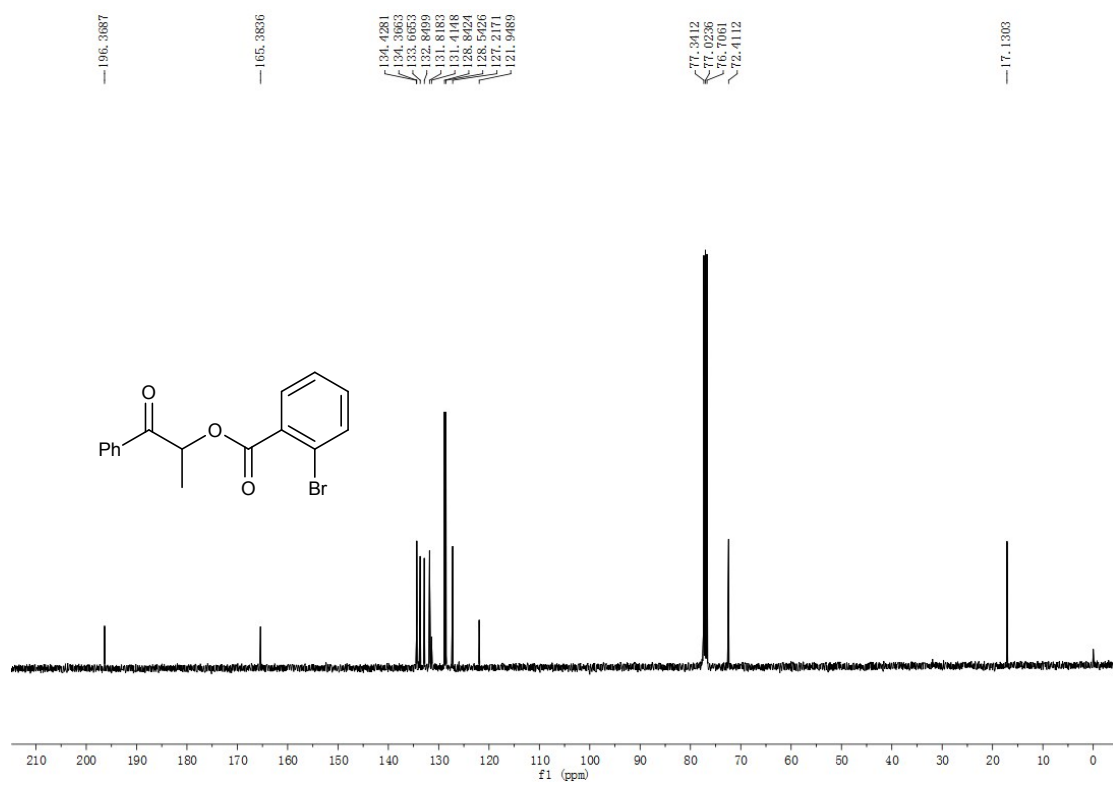

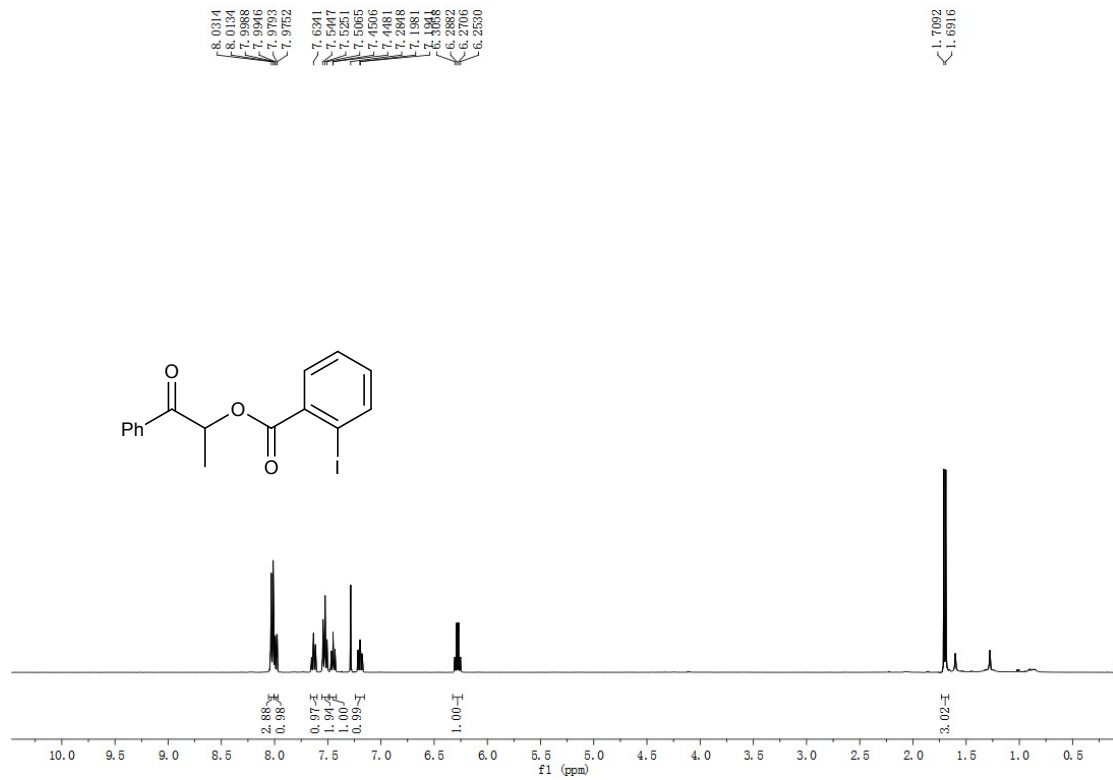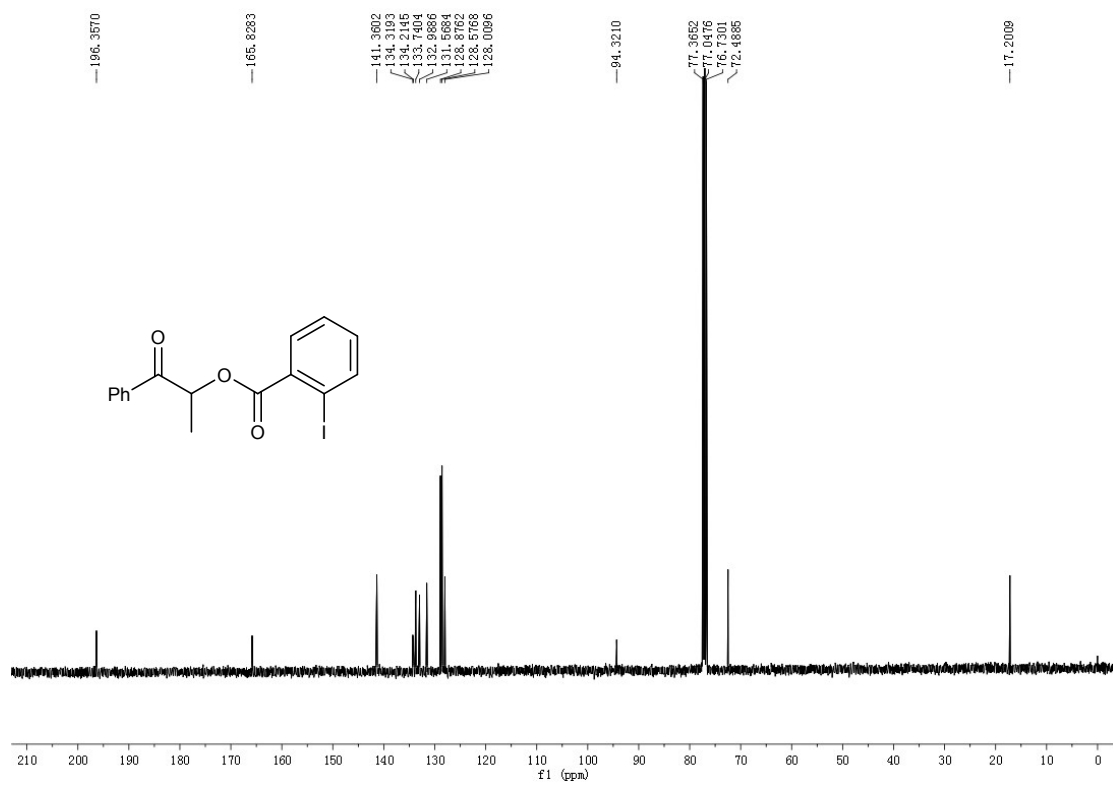

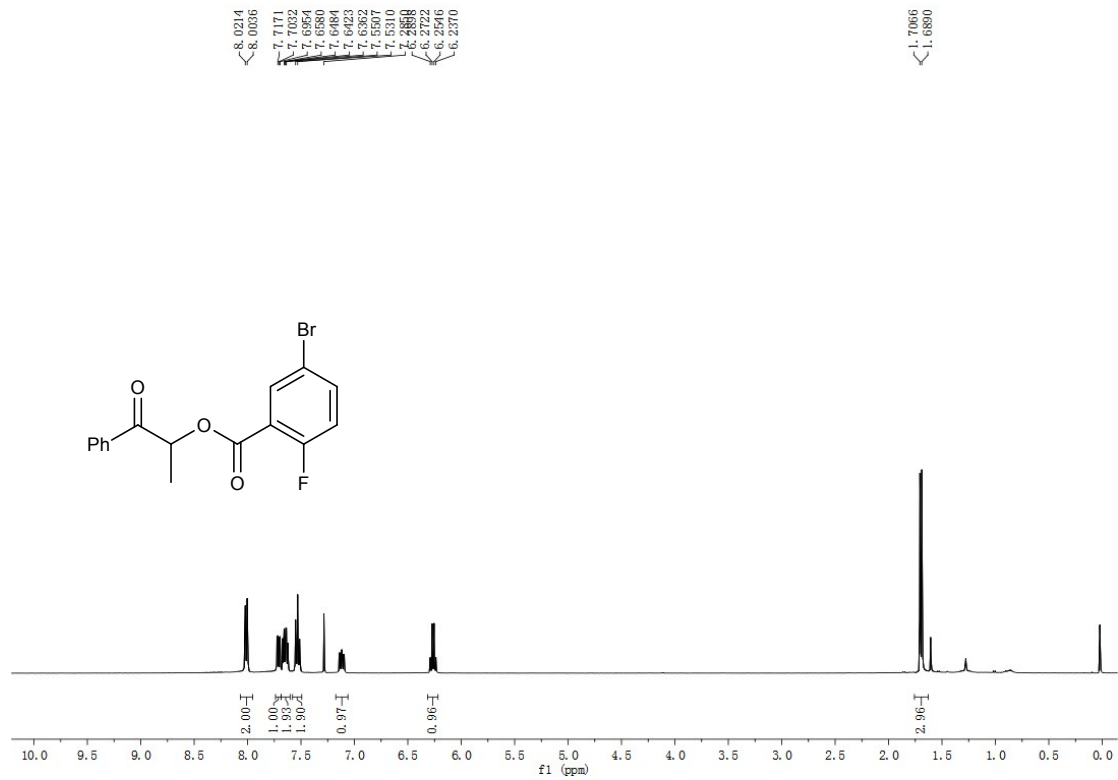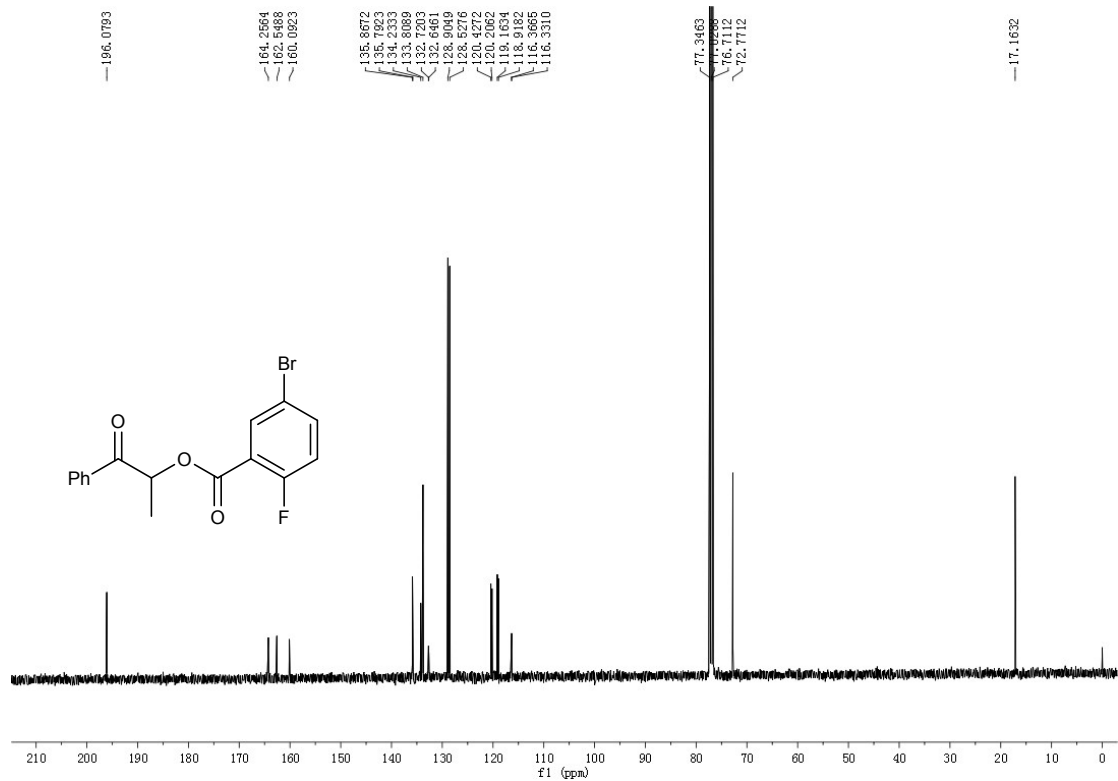

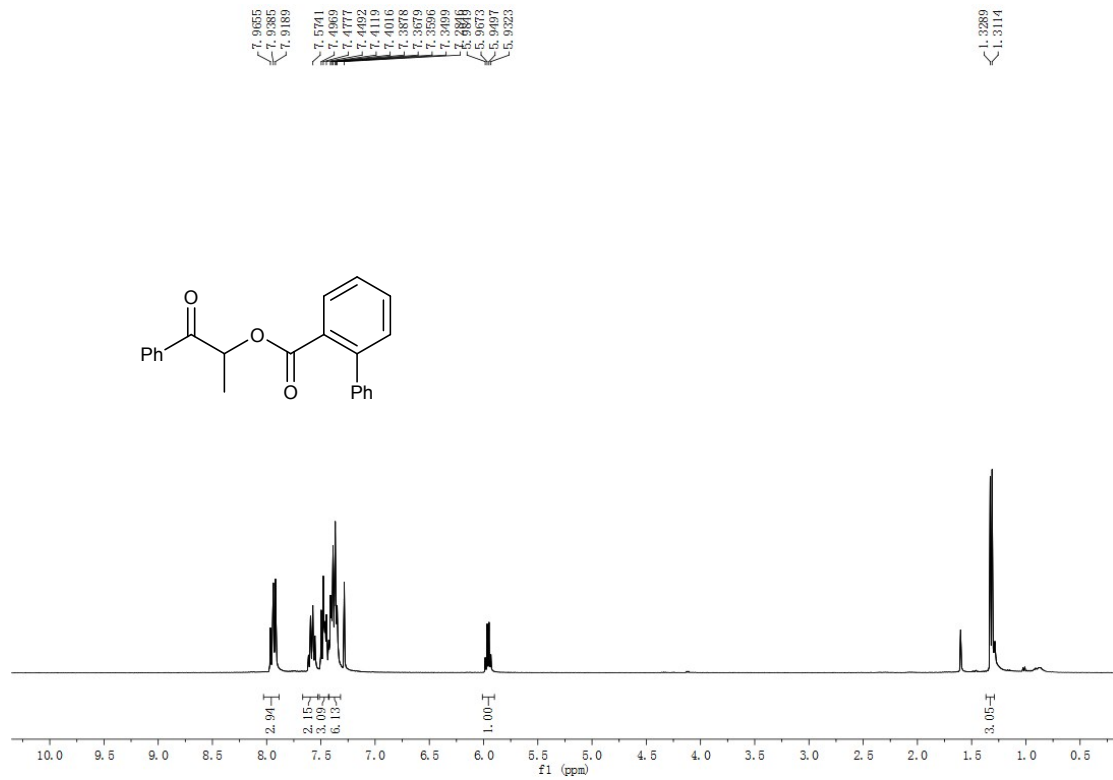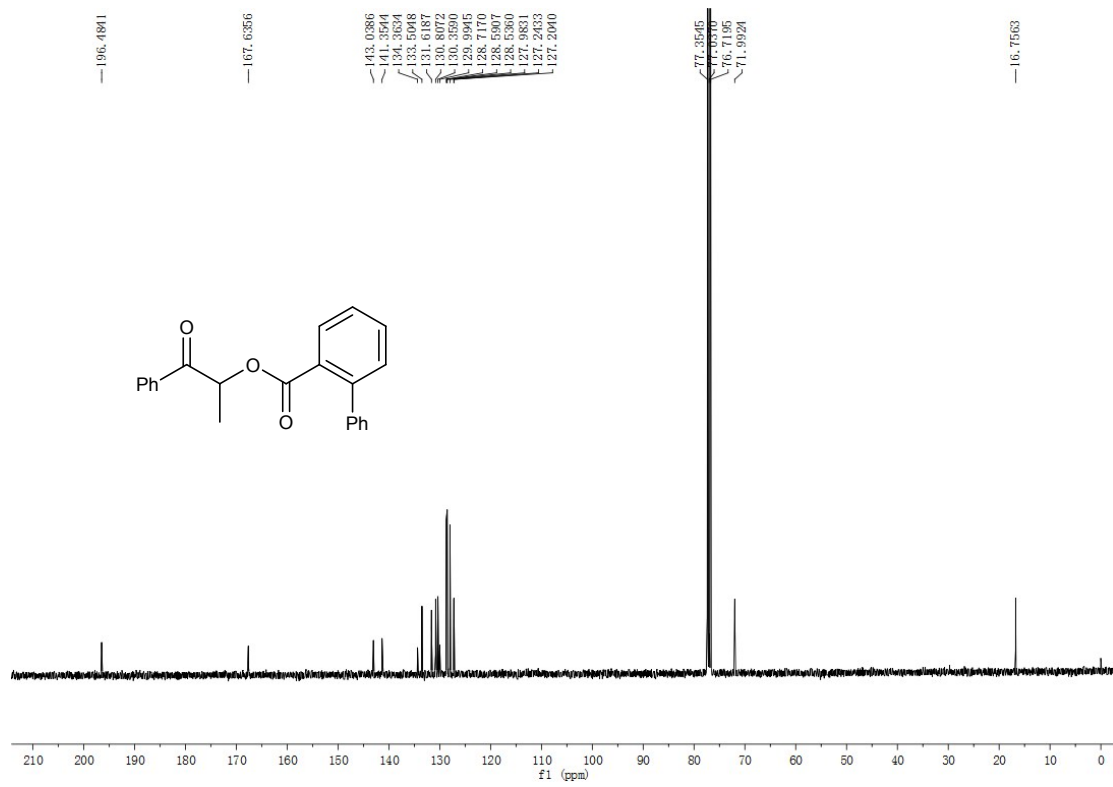



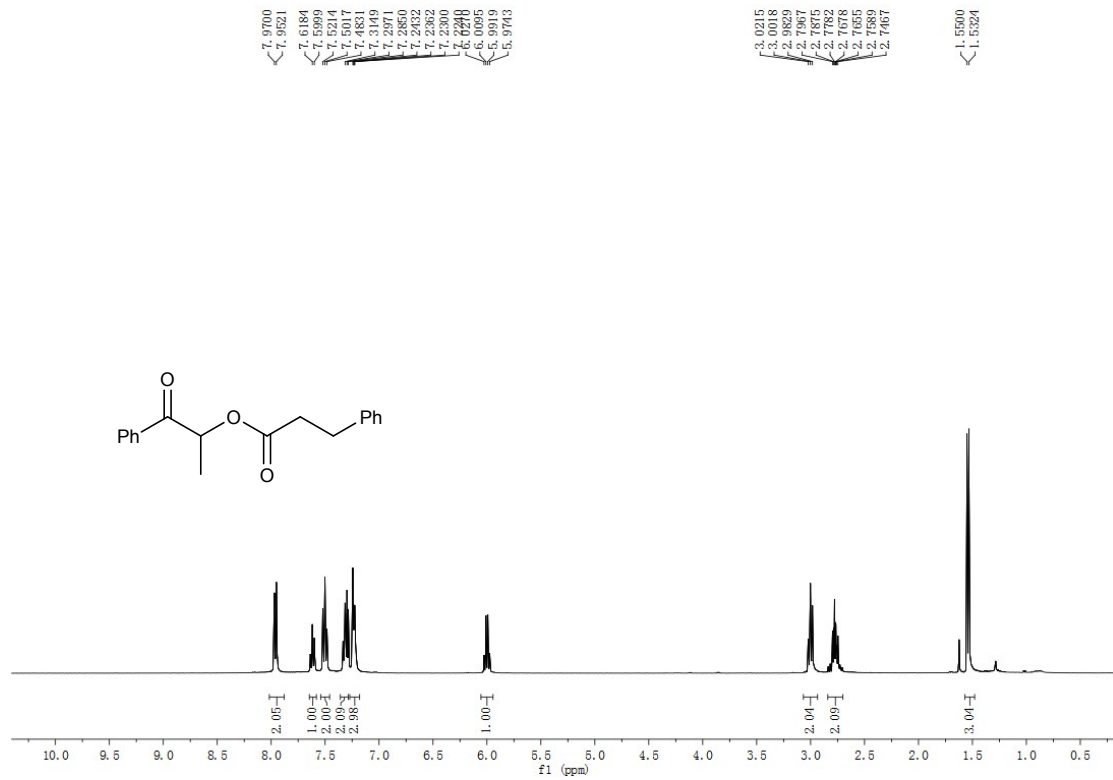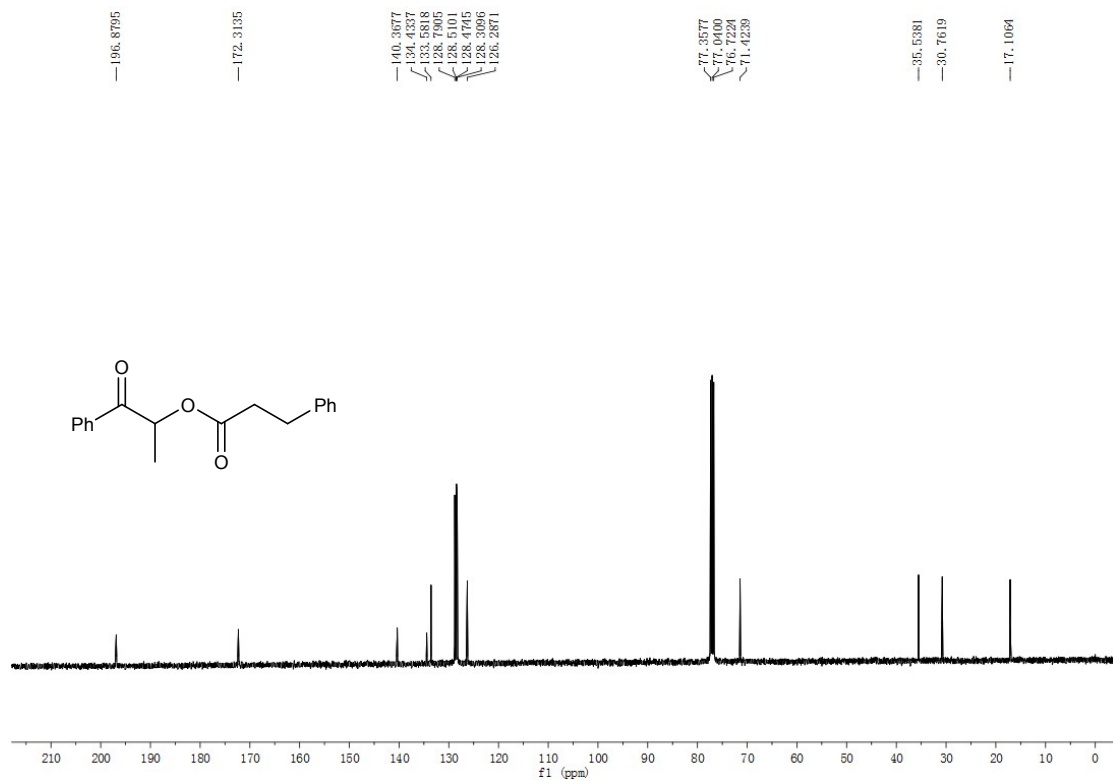

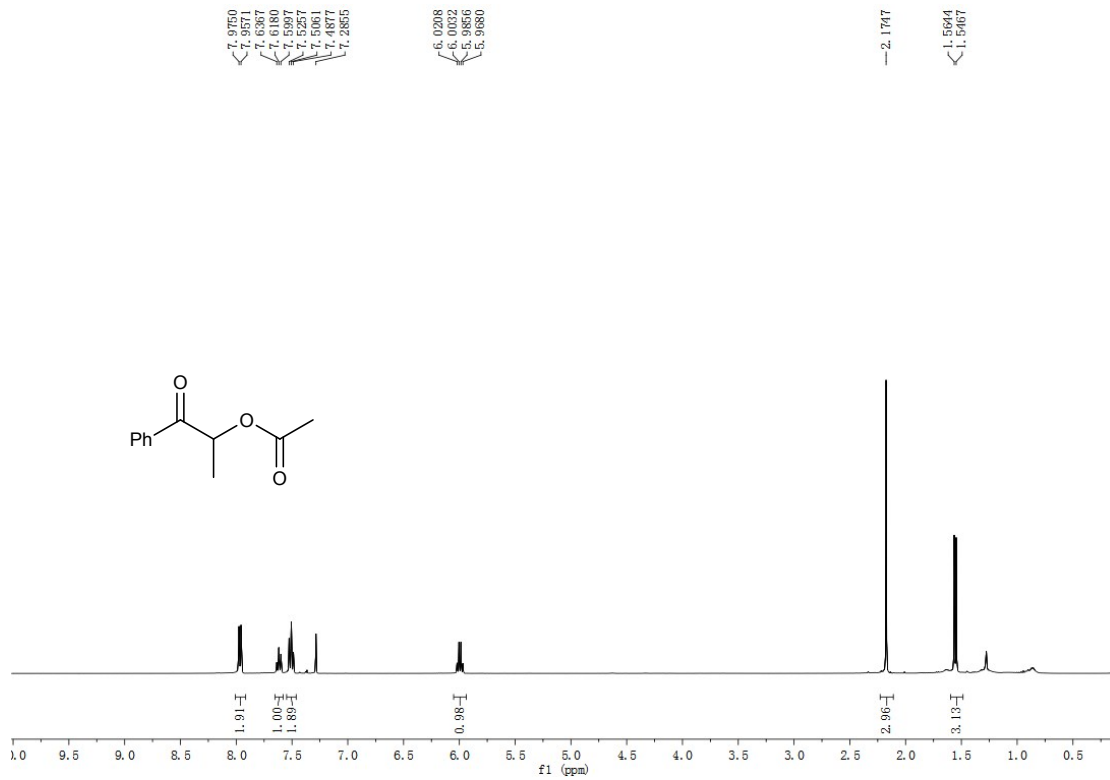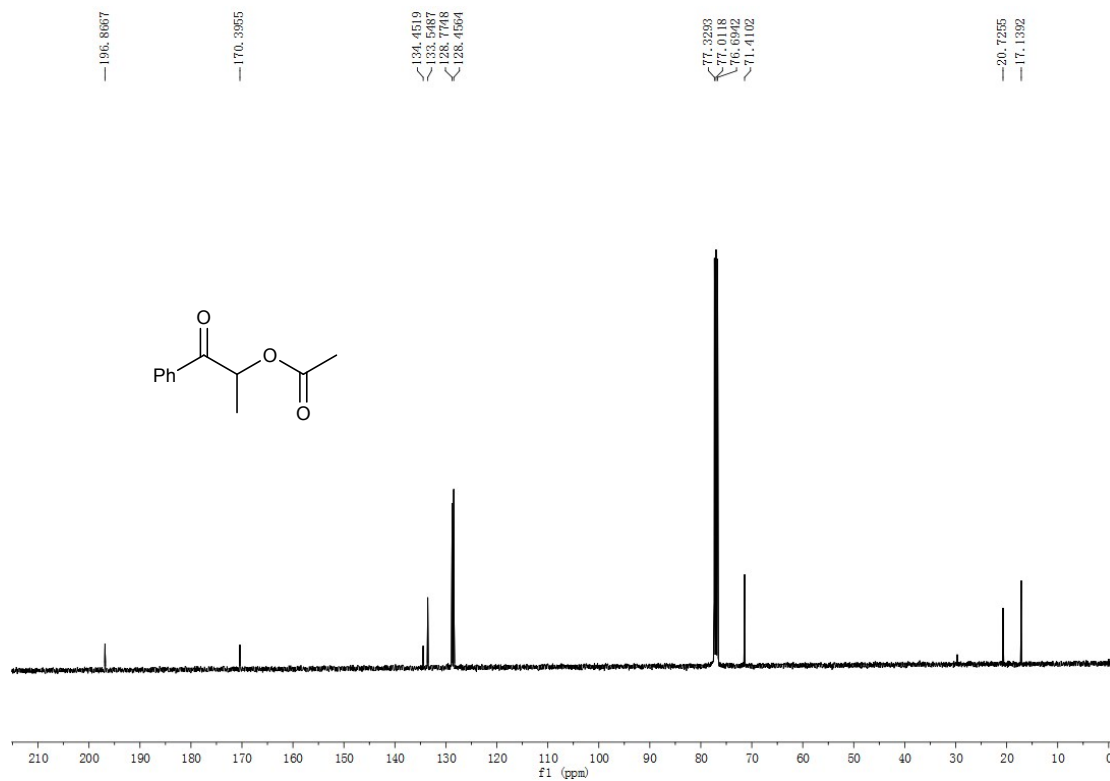

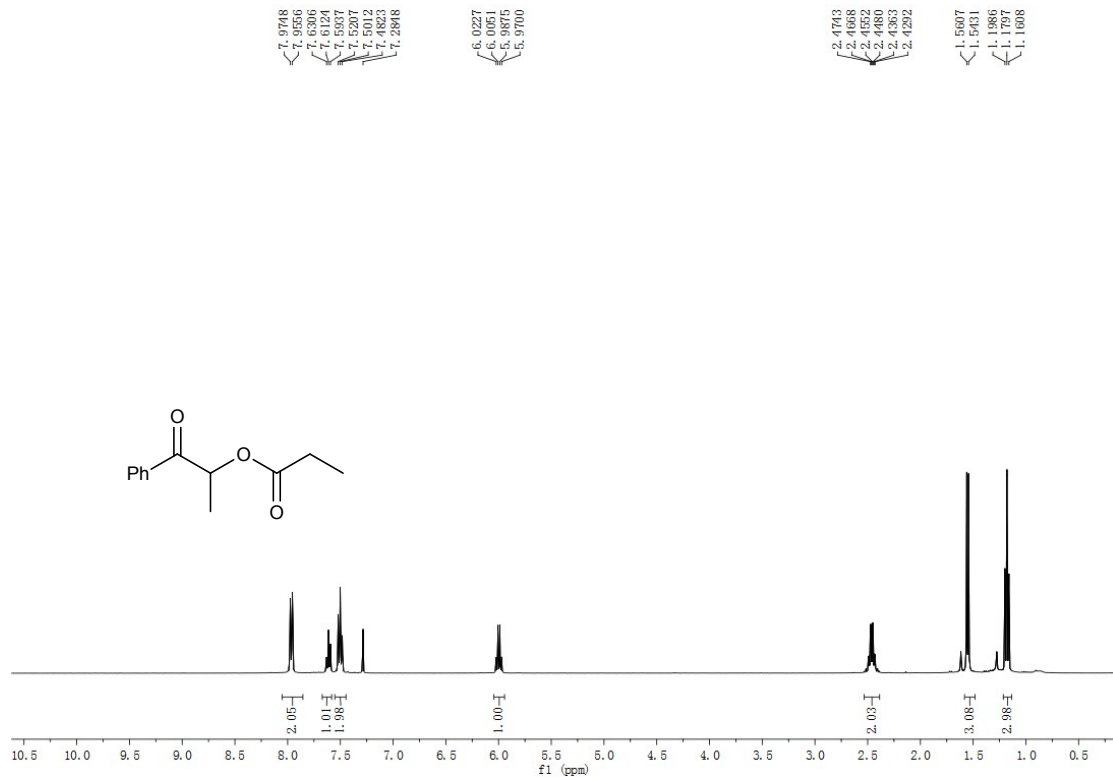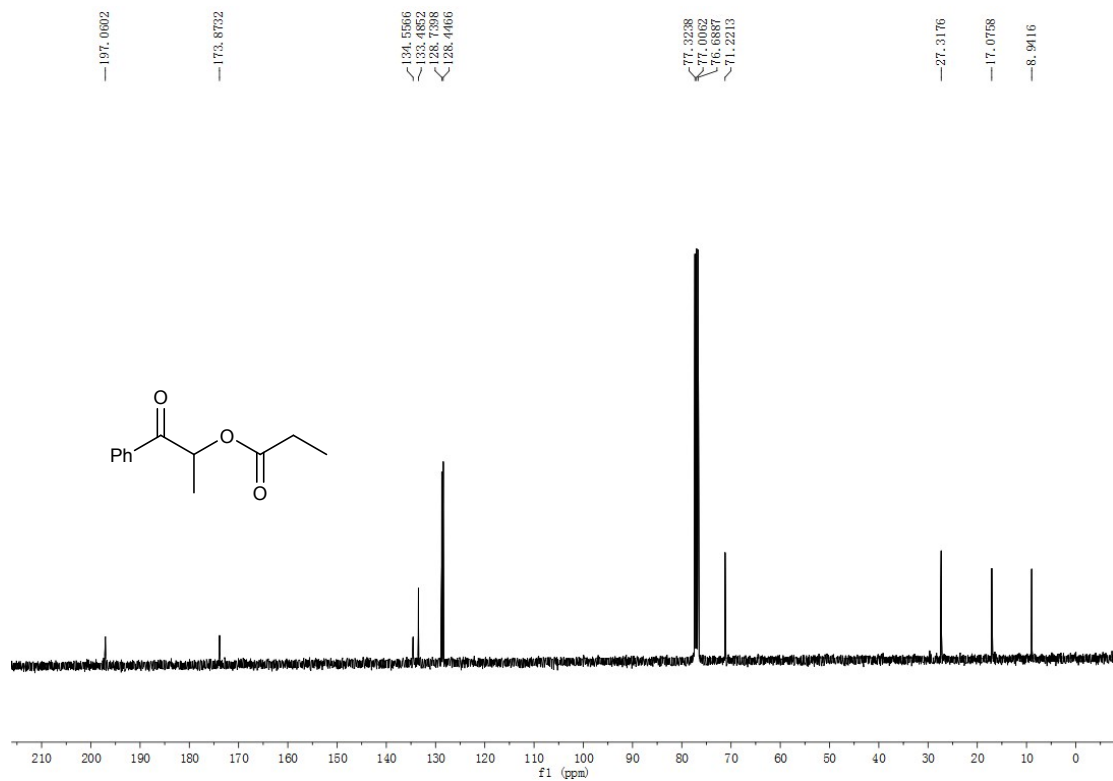

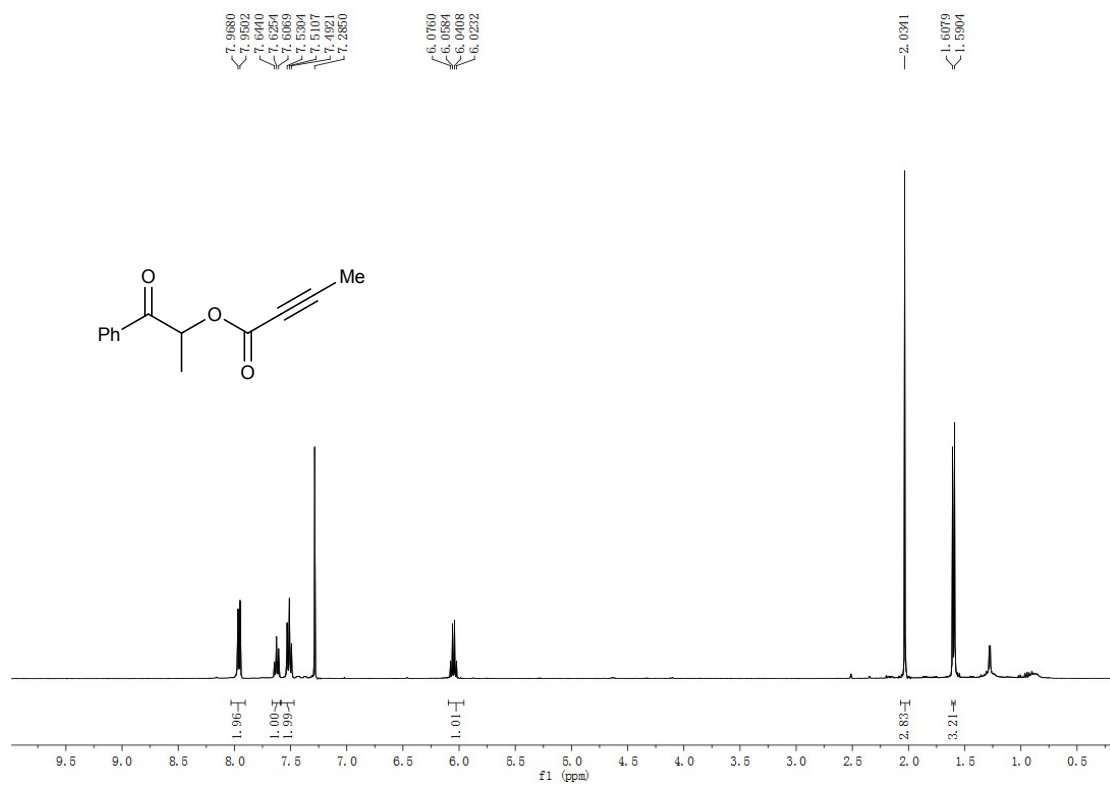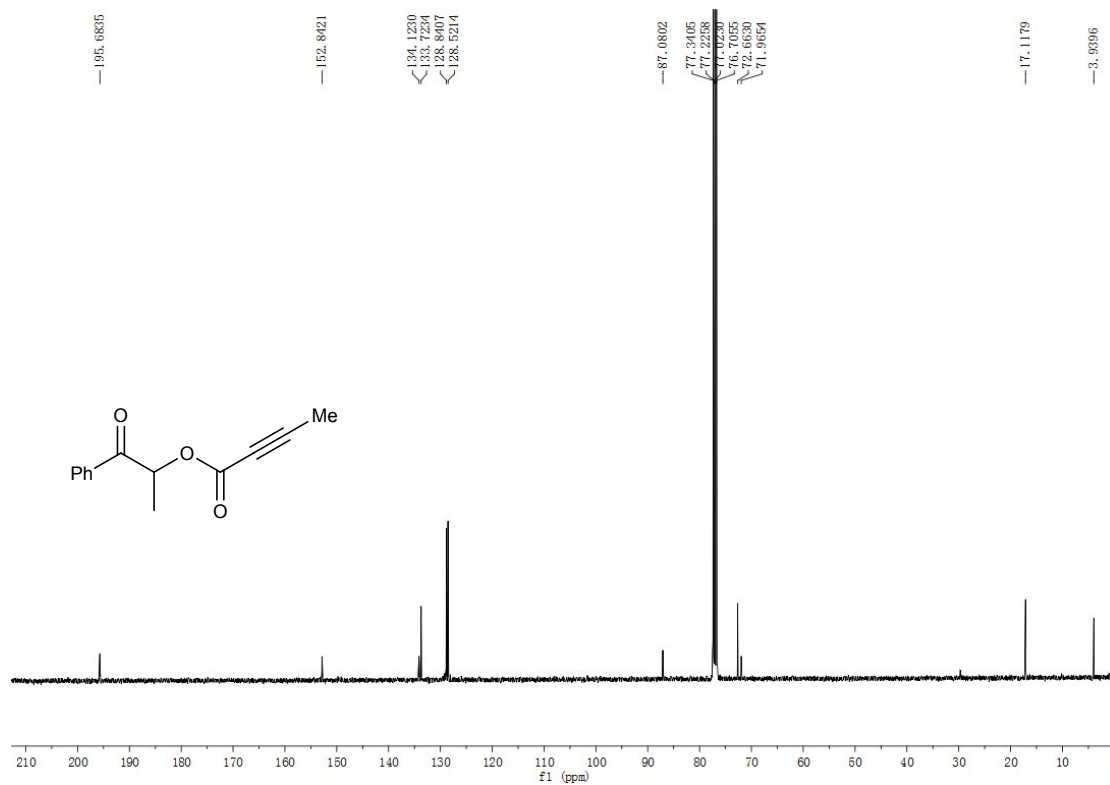

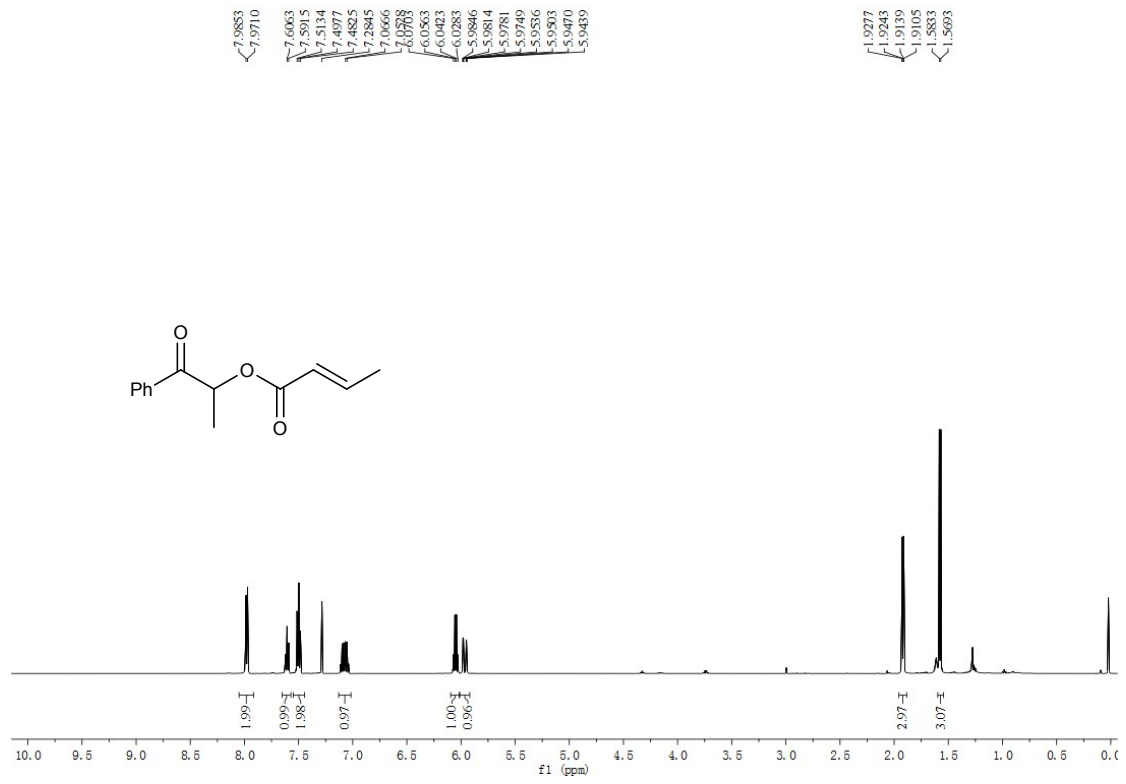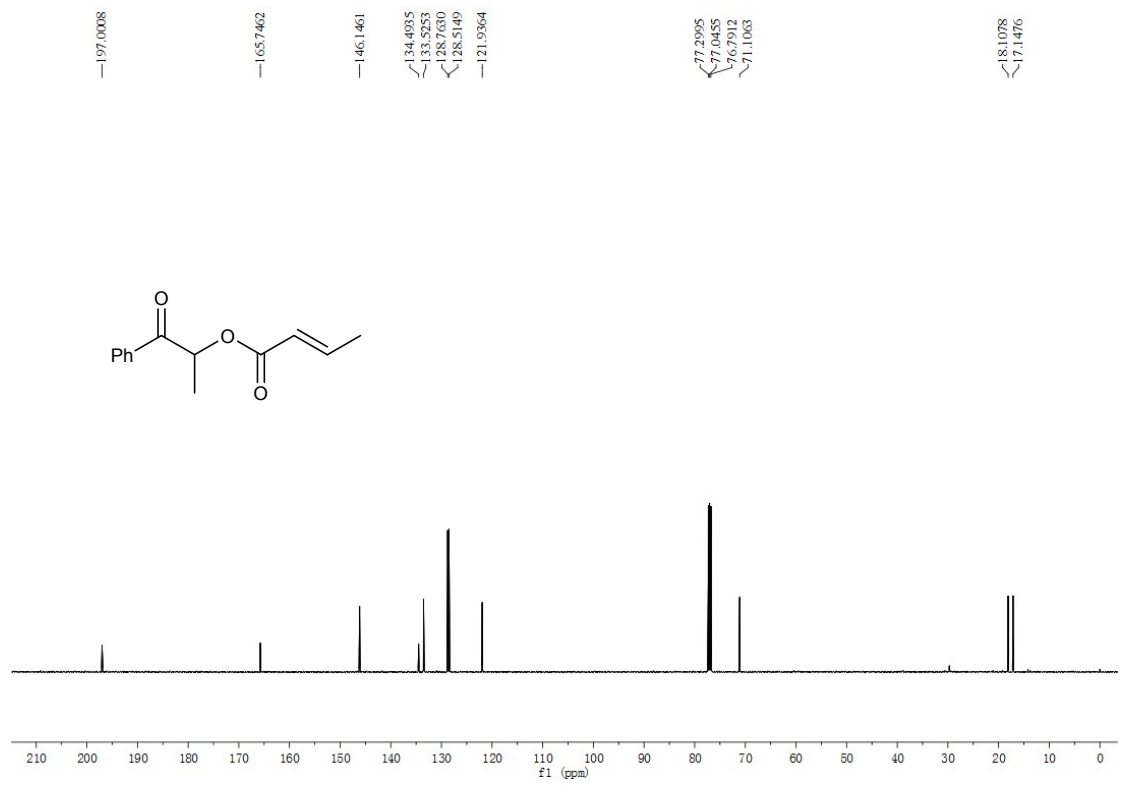

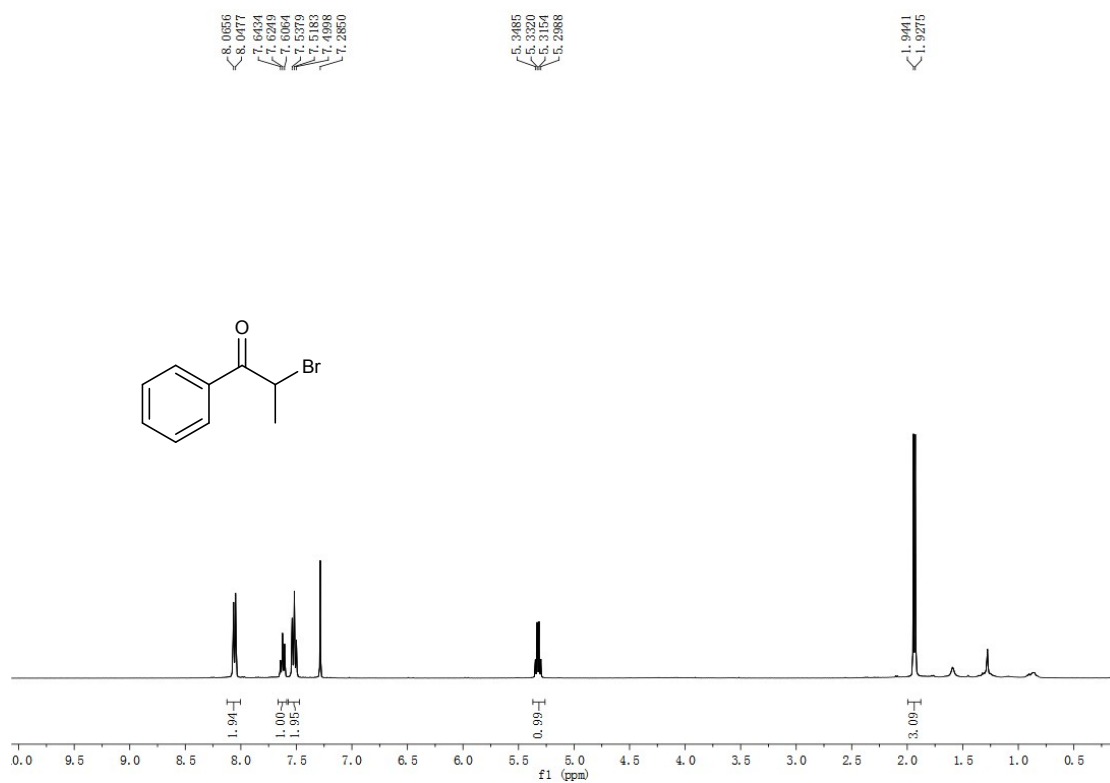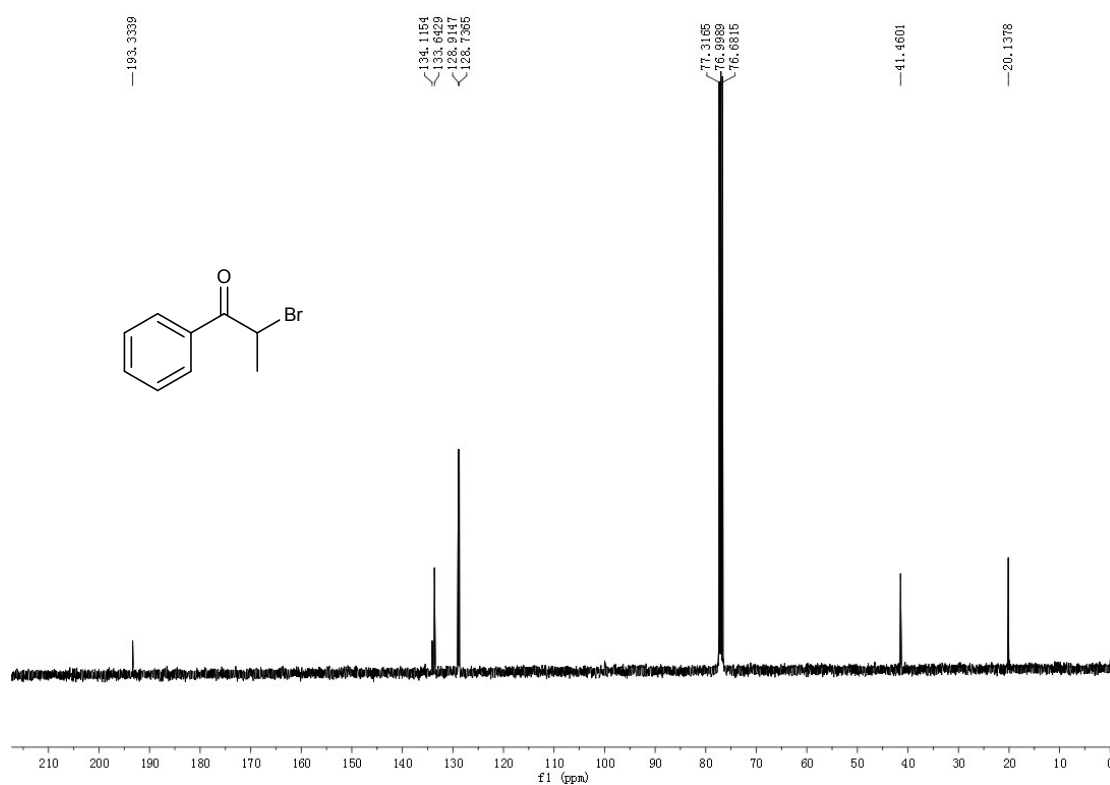

Supplement: c6ob02173e1.pdf [file c6ob02173e1.pdf]
